# Supplementary material
Source: PubMed Central journal article supplement (PMC317299)
Supplement: 1471-2296-4-18-S3.pdf [file 1471-2296-4-18-S3.pdf]

Additional file 3: Outcome data for included studies

| Author 2             | Treatments & daily dose (mg)                                                           | Units | Total cholesterol                                                            | LDL cholesterol                                                             | HDL cholesterol                                                           | Triglycerides                                                                              | Significance testing                                                                                                                                                                                                                                        |
|----------------------|----------------------------------------------------------------------------------------|-------|------------------------------------------------------------------------------|-----------------------------------------------------------------------------|---------------------------------------------------------------------------|--------------------------------------------------------------------------------------------|-------------------------------------------------------------------------------------------------------------------------------------------------------------------------------------------------------------------------------------------------------------|
| Albert et al, 2001 a | Pravastatin 40 mg/d (n=1014)                                                           | mg/dL | Pravastatin:<br>Baseline 231 ± 34<br>24 wks -38.3 no SD<br>change -16% no SD | Pravastatin:<br>Baseline 143 ± 26<br>24 wks -32 no SD<br>change -22% no SD  | Pravastatin:<br>Baseline 40 ± 10<br>24 wks +2.3 no SD<br>change +7% no SD | Pravastatin: MEDIAN<br>Baseline 160 (IQR 114-233)<br>24 wks -18 no SD<br>change -13% no SD |                                                                                                                                                                                                                                                             |
|                      | Placebo (n=999)                                                                        |       | Placebo:<br>Baseline 231 ± 32<br>24 wks +1.1 no SD<br>change +1.2% no SD     | Placebo:<br>Baseline 143 ±26<br>24 wks +0.6 no SD<br>change +1.8% no SD     | Placebo:<br>Baseline 40 — 11<br>24 wks +0.8 no SD<br>change +2% no SD     | Placebo: MEDIAN<br>Baseline 161 (IQR 116-231)<br>24 wks -3.0 no SD<br>change -2% no SD     |                                                                                                                                                                                                                                                             |
| Arntz et al, 1999    | Pravastatin 20 mg once daily (n= 58)                                                   | mg/dL | Pravastatin:<br>Baseline 364 ± 75<br>12 wks 281 ± 61<br>absolute change -83  | Pravastatin:<br>Baseline 288 ± 81<br>12 wks 206 ± 64<br>absolute change -82 | Pravastatin:<br>Baseline 46 ± 17<br>12 wks 50 ± 18<br>absolute change +4  | Pravastatin:<br>Baseline 168 ± 83<br>12 wks 148 ± 80<br>absolute change -20                | Significant change from baseline at 12 wks with pravastatin for triglycerides & HDL (p<0.05) and LDL cholesterol (p<0.01).<br><br>Significant change from baseline at 12 wks with bezafibrate for HDL (p<0.05) and triglycerides & LDL cholesterol (p<0.01) |
|                      | Bezafibrate 400 mg daily (n= 38)<br><br>Dose doubled if LDL was >190 mg/dL after 6 wks |       | Bezafibrate:<br>Baseline 363 ± 91<br>12 wks 325 ± 73<br>absolute change -38  | Bezafibrate:<br>Baseline 284 ± 88<br>12 wks 242 ± 70<br>absolute change -42 | Bezafibrate:<br>Baseline 52 ± 18<br>12 wks 58 ± 21<br>absolute change +6  | Bezafibrate:<br>Baseline 173 ± 91<br>12 wks 121 ± 83<br>absolute change -52                |                                                                                                                                                                                                                                                             |

| Author 2           | Treatments & daily dose (mg)                                                                               | Units  | Total cholesterol                                                                  | LDL cholesterol                                                                    | HDL cholesterol                                                                 | Triglycerides                                                                    | Significance testing                                                                                                                                     |
|--------------------|------------------------------------------------------------------------------------------------------------|--------|------------------------------------------------------------------------------------|------------------------------------------------------------------------------------|---------------------------------------------------------------------------------|----------------------------------------------------------------------------------|----------------------------------------------------------------------------------------------------------------------------------------------------------|
| Bak et al, 1998    | Pravastatin 20 mg + Step 1 diet: (n= 54)                                                                   | mmol/L | Pravastatin Step 1: Baseline 7.28 ± 0.58; 6 mths no data; change - 19.4% ± SEM 1.6 | Pravastatin Step 1: Baseline 5.15 ± 0.74; 6 mths no data; change - 26.7% ± SEM 2.1 | Pravastatin Step 1: Baseline 1.1 ± 0.3; 6 mths no data; change +14.1% ± SEM 4.9 | Pravastatin Step 1: Baseline 2.19 ± 1.1; 6 mths no data; change - 8.2% ± SEM 5.8 | Significant reductions in total cholesterol with pravastatin                                                                                             |
|                    | Pravastatin 20 mg + Step 2 diet: (n= 55)                                                                   |        | Pravastatin Step 2: Baseline 7.20 ± 0.61; 6 mths no data; change - 20.7% ± SEM 1.7 | Pravastatin Step 2: Baseline 5.06 ± 0.68; 6 mths no data; change - 28.8% ± SEM 2.4 | Pravastatin Step 2: Baseline 1.1 ± 0.2; 6 mths no data; change +10.6% ± SEM 2.6 | Pravastatin Step 2: Baseline 2.2 ± 0.89; 6 mths no data; change - 6.6% ± SEM 5.4 |                                                                                                                                                          |
|                    | Placebo + Step 1 diet (n= 53)                                                                              |        | Placebo Step 1: Baseline 7.37 ± 0.67; 6 mths no data; change +0.5% ± SEM 1.3       | Placebo Step 1: Baseline 5.29 ± 0.59; 6 mths no data; change +1.8% ± SEM 1.4       | Placebo Step 1: Baseline 1.1 ± 0.2; 6 mths no data; change +2.9% ± SEM 2.6      | Placebo Step 1: Baseline 2.06 ± 1.0; 6 mths no data; change +7.8% ± SEM 7.9      |                                                                                                                                                          |
|                    | Placebo + Step 2 diet (n= 53)                                                                              |        | Placebo Step 1: Baseline 7.37 ± 0.62; 6 mths no data; change - 6.3 ± SEM 1.4       | Placebo Step 1: Baseline 5.34 ± 0.62; 6 mths no data; change - 8.6% ± SEM 2.0      | Placebo Step 1: Baseline 1.1 ± 0.2; 6 mths no data; change +5.8% ± 3.6          | Placebo Step 1: Baseline 2.08 ± 0.73; 6 mths no data; change - 0.02% ± SEM 5.6   |                                                                                                                                                          |
|                    |                                                                                                            |        |                                                                                    |                                                                                    |                                                                                 |                                                                                  |                                                                                                                                                          |
| Beigel et al, 1993 | Pravastatin 20 mg (evening) (n= 38)                                                                        | mg/dL  | Pravastatin: Baseline 262 ± 4.0; 26 wks 214 ± 5.0; change no data                  | Pravastatin: Baseline 186 ± 4.0; 26 wks 191 ± 5.0; change no data                  | Pravastatin: Baseline 37.9 ± 1.4; 26 wks 42.8 ± 1.7; change no data             | Pravastatin: Baseline 165 ± 12; 26 wks 115 ± 11; change no data                  | Pravastatin: Significant reduction in total cholesterol from baseline & better than placebo (p<0.001) for total cholesterol, LDL, HDL and triglycerides. |
|                    | Placebo (n=39)                                                                                             |        | Placebo: Baseline 267 ± 3.0; 26 wks 268 ± 4.0; change no data                      | Placebo: Baseline 191 ± 4.0; 26 wks 144 ± 4.0; change no data                      | Placebo: Baseline 39.5 ± 1.6; 26 wks 38.9 ± 1.6; change no data                 | Placebo: Baseline 158 ± 11; 26 wks 162 ± 11; change no data                      |                                                                                                                                                          |
|                    | Dose doubled in 6 pts after 13 wks because total cholesterol >200 mg/dL & reduction from baseline was <15% |        |                                                                                    |                                                                                    |                                                                                 |                                                                                  |                                                                                                                                                          |

| Author 2              | Treatments & daily dose (mg)                                                                                                                                                                                                                                              | Units  | Total cholesterol                                                                                                                                                       | LDL cholesterol                                                                                                                                                   | HDL cholesterol                                                                                                                                                     | Triglycerides                                                                                                                                                          | Significance testing                                                                                                                         |
|-----------------------|---------------------------------------------------------------------------------------------------------------------------------------------------------------------------------------------------------------------------------------------------------------------------|--------|-------------------------------------------------------------------------------------------------------------------------------------------------------------------------|-------------------------------------------------------------------------------------------------------------------------------------------------------------------|---------------------------------------------------------------------------------------------------------------------------------------------------------------------|------------------------------------------------------------------------------------------------------------------------------------------------------------------------|----------------------------------------------------------------------------------------------------------------------------------------------|
| Bertolini et al, 1997 | Atorvastatin 10 mg (n= 227)<br><br>Pravastatin 20 mg (n= 78)<br><br>Once in the evening<br><br>Initial dose was doubled at wk 16 if LDL goals not met at wk 4 & 10<br>By wk 52 daily dose taken:<br>Atorv 10 mg 76%<br>Atorv20 mg 24%<br>Prav 20 mg 36%<br>Prav 40 mg 64% | mmol/L | Atorvastatin:<br>Baseline 7.16 ± SE 0.05<br>1 yr no data<br>Change -25% ± SE 0.8<br><br>Pravastatin:<br>Baseline 7.19 ± SE 0.07<br>1 yr no data<br>Change -16% ± SE 1.2 | Atorvastatin:<br>Baseline 5.02 ± 0.04<br>1 yr no data<br>Change -35% ± SE 1.0<br><br>Pravastatin:<br>Baseline 5.07 ± 0.06<br>1 yr no data<br>Change -23% ± SE 1.6 | Atorvastatin:<br>Baseline 1.37 ± 0.03<br>1 yr no data<br>Change +7% ± SE 1.0<br><br>Pravastatin:<br>Baseline 1.27 ± SE 0.03<br>1 yr no data<br>Change +10% ± SE 1.5 | Atorvastatin:<br>Baseline 1.65 ± SE 0.05<br>1 yr no data<br>Change -14% ± SE 2.0<br><br>Pravastatin:<br>Baseline 1.80 ± SE 0.09<br>1 yr no data<br>Change -3% ± SE 3.1 | Atorvastatin was significantly better at reducing total cholesterol, LDL & triglycerides than pravastatin. No significant difference for HDL |
| Bestehorn et al, 1997 | Simvastatin 20 mg (n= 129 )<br><br>Placebo (n= 125)<br><br>Once daily<br>Dose doubled after 6 wks if LDL >90 mg/dL. After 12 wks an ion exchange resin was added if LDL > 120 mg/dL with simvastatin (>250 mg/dL with placebo)<br><br>Mean dose/day taken                 | mg/dL  | Simvastatin:<br>Baseline 240 ± SE 3.8<br>30 mths no data<br>change -28.5%<br><br>Placebo:<br>Baseline 243 ± SE 3.5<br>No further data                                   | Simvastatin:<br>Baseline 165 ± SE 3.3<br>30 mths<br>change -35%<br><br>Placebo:<br>Baseline 167 ± SE 3.2<br>30 mths no data<br>change no change                   | Simvastatin:<br>Baseline 44 ± SE 0.9<br>30 mths no data<br>change +6.1%<br><br>Placebo:<br>Baseline 44 ± SE 0.9<br>No further data                                  | Triglycerides fell by 28% with simvastatin. No further data provided.                                                                                                  |                                                                                                                                              |

| Author 2               | Treatments & daily dose (mg)                       | Units                                    | Total cholesterol                         | LDL cholesterol                           | HDL cholesterol                          | Triglycerides                                                                                                                 | Significance testing                                                                                                          |
|------------------------|----------------------------------------------------|------------------------------------------|-------------------------------------------|-------------------------------------------|------------------------------------------|-------------------------------------------------------------------------------------------------------------------------------|-------------------------------------------------------------------------------------------------------------------------------|
| Betteridge et al, 1999 | Treatments given orally, once daily in the evening | mg/dL                                    | Cerivastatin 0.025 mg: Baseline 298 no SD | Cerivastatin 0.025 mg: Baseline 218 no SD | Cerivastatin 0.025 mg: Baseline 52 no SD | Cerivastatin 0.025 mg: Baseline 141 no SD                                                                                     |                                                                                                                               |
|                        | Cerivastatin 0.025 mg (n=193)                      |                                          | 12 wks no data<br>change -8.8% ± SE 0.7   | 12 wks no data<br>change -11.5% ± SE 0.9  | 12 wks no data<br>change +0.2% ± SE 1.0  | 12 wks no data<br>change -0.2% ± SE 2.0                                                                                       |                                                                                                                               |
|                        | Cerivastatin 0.05 mg (n=187)                       |                                          | Cerivastatin 0.5 mg: Baseline 294 no SD   | Cerivastatin 0.5 mg: Baseline 215 no SD   | Cerivastatin 0.5 mg: Baseline 53 no SD   | Cerivastatin 0.5 mg: Baseline 136 no SD                                                                                       |                                                                                                                               |
|                        | Cerivastatin 0.1 mg (n=190)                        |                                          | 12 wks no data<br>change -11.9% ± SE 0.7  | 12 wks no data<br>change -15.5% ± SE 0.9  | 12 wks no data<br>change +1.4% ± SE 0.9  | 12 wks no data<br>change -5.7% ± SE 2.0                                                                                       |                                                                                                                               |
|                        | Cerivastatin 0.1 mg (n=190)                        |                                          | Cerivastatin 0.1 mg: Baseline 292 no SD   | Cerivastatin 0.1 mg: Baseline 212 no SD   | Cerivastatin 0.1 mg: Baseline 51 no SD   | Cerivastatin 0.1 mg: Baseline 143 no SD                                                                                       |                                                                                                                               |
|                        | Cerivastatin 0.2 mg (n=191)                        |                                          | 12 wks no data<br>change -17.8% ± SE 0.7  | 12 wks no data<br>change -23.6% ± SE 0.9  | 12 wks no data<br>change +3.7% ± SE 1.0  | 12 wks no data<br>change -10.4% ± SE 2.0                                                                                      |                                                                                                                               |
| Bevilacqua et al, 1997 | Cerivastatin 0.2 mg (n=191)                        | Cerivastatin 0.2 mg: Baseline 295 no SD  | Cerivastatin 0.2 mg: Baseline 216 no SD   | Cerivastatin 0.2 mg: Baseline 52 no SD    | Cerivastatin 0.2 mg: Baseline 140 no SD  | Fluvastatin was significantly better at reducing total cholesterol, LDL (p<0.01), HDL and triglycerides (p<0.05) than placebo |                                                                                                                               |
|                        | Placebo (n= 187)                                   | 12 wks no data<br>change -21.8% ± SE 0.7 | 12 wks no data<br>change -29.1% ± SE 0.9  | 12 wks no data<br>change +3.2 ± SE 1.0    | 12 wks no data<br>change -10.9% ± SE 2.0 |                                                                                                                               |                                                                                                                               |
|                        | Simvastatin 20 mg (n=183)                          | Simvastatin 20 mg: Baseline 298 no SD    | Simvastatin 20 mg: Baseline 218 no SD     | Simvastatin 20 mg: Baseline 53 no SD      | Simvastatin 20 mg: Baseline 137 no SD    |                                                                                                                               |                                                                                                                               |
|                        | Placebo                                            | 12 wks no data<br>change -28.2% ± SE 0.7 | 12 wks no data<br>change -38.3% ± SE 0.9  | 12 wks no data<br>change +5.2% ± SE 1.0   | 12 wks no data<br>change -12.8% ± SE 2.0 |                                                                                                                               |                                                                                                                               |
|                        | Placebo                                            | Placebo: Baseline 300 no SD              | Placebo: Baseline 218 no SD               | Placebo: Baseline 54 no SD                | Placebo: Baseline 140 no SD              |                                                                                                                               |                                                                                                                               |
|                        | Placebo                                            | 12 wks no data<br>change -0.5% ± SE 0.7  | 12 wks no data<br>change -0.3% ± SE 0.9   | 12 wks no data<br>change -1.1% ± SE 1.0   | 12 wks no data<br>change +5.7% ± SE 2.0  |                                                                                                                               |                                                                                                                               |
| Bevilacqua et al, 1997 | Fluvastatin 40 mg (n= 25)                          | mg/dL                                    | Fluvastatin: Baseline 246 ± 48            | Fluvastatin: Baseline 173 ± 40            | Fluvastatin: Baseline 48 ± 14            | Fluvastatin: Baseline 117 ± 42                                                                                                | Fluvastatin was significantly better at reducing total cholesterol, LDL (p<0.01), HDL and triglycerides (p<0.05) than placebo |
|                        | Placebo (n= 23)                                    |                                          | 20 wks 216 ± 44<br>change no data         | 20 wks 134 ± 44<br>change no data         | 20 wks 57 ± 14<br>change no data         | 20 wks 124 ± 65<br>change no data                                                                                             |                                                                                                                               |
|                        | Once daily                                         |                                          | Placebo: Baseline 245 ± 59                | Placebo: Baseline 165 ± 49                | Placebo: Baseline 45 ± 12                | Placebo: Baseline 133 ± 64                                                                                                    |                                                                                                                               |
|                        |                                                    |                                          | 20 wks 271 ± 53<br>change no data         | 20 wks 187 ± 56<br>change no data         | 20 wks 51 ± 19<br>change no data         | 20 wks 181 ± 101<br>change no data                                                                                            |                                                                                                                               |

| Author 2                | Treatments & daily dose (mg)                         | Units  | Total cholesterol                                                                 | LDL cholesterol                                                                    | HDL cholesterol                                                                               | Triglycerides                                                                        | Significance testing                                                                |
|-------------------------|------------------------------------------------------|--------|-----------------------------------------------------------------------------------|------------------------------------------------------------------------------------|-----------------------------------------------------------------------------------------------|--------------------------------------------------------------------------------------|-------------------------------------------------------------------------------------|
| Blankenhorn et al, 1993 | Lovastatin 80 mg (n= 123)<br>40 mg given twice daily | mmol/L | Lovastatin:<br>Baseline 5.97 ± 0.61<br>2 yrs 4.03 ± 0.45<br>change -32.3% ± 7.0   | Lovastatin:<br>Baseline 3.91 ± 0.62<br>2 yrs 2.41 ± 0.42<br>change -38.0% ± 12.3   | Lovastatin:<br>Baseline 1.10 ± 0.26<br>2 yrs 1.18 ± 0.25<br>change +8.5 ± 10.3                | Lovastatin:<br>Baseline 1.80 ± 0.83<br>2 yrs 1.36 ± 0.25<br>change -21.6% ± 20.2     | significant change from baseline for all lipid parameters with lovastatin (p<0.001) |
|                         | Placebo (n= 124)<br><br>Mean daily dose taken 73 mg  |        | Placebo:<br>Baseline 6.01 ± 0.59<br>2 yrs 5.90 ± 0.68<br>change -1.8% ± 7.5       | Placebo:<br>Baseline 4.00 ± 0.64<br>2 yrs 3.96 ± 0.63<br>change -0.9% ± 13.8       | Placebo:<br>Baseline 1.11 ± 0.25<br>2 yrs 1.13 ± 0.24<br>change +2.3% ± 11.9                  | Placebo:<br>Baseline 1.80 ± 0.85<br>2 yrs 1.82 ± 1.07<br>change +3.5% ± 26.5         |                                                                                     |
| Bradford et al, 1991    | Lovastatin 20 mg once in evening (n = 1642)          | mg/dL  | Lovastatin 20 mg once:<br>Baseline 258 ± 21<br>48 wks no data<br>change -17% ± 8  | Lovastatin 20 mg once:<br>Baseline 180 ± 21<br>48 wks no data<br>change -24% ± 11  | Lovastatin 20 mg oncepm:<br>Baseline 45 ± 12.4<br>48 wks no data<br>change +6.6% ± 13         | Lovastatin 20 mg once:<br>Baseline 152 no SD<br>48 wks no data<br>change -10% no SD  |                                                                                     |
|                         | Lovastatin 40 mg once in evening (n = 1645)          |        | Lovastatin 40 mg once:<br>Baseline 259 ± 20<br>48 wks no data<br>change -22% ± 8  | Lovastatin 40 mg once:<br>Baseline 180 ± 21<br>48 wks no data<br>change -30% ± 11  | Lovastatin 40 mg once pm<br>Baseline 45.2 ± 11.8<br>48 wks no data<br>change +7.2% ± 13       | Lovastatin 40 mg once:<br>Baseline 156 no SD<br>48 wks no data<br>change -14% no SD  |                                                                                     |
|                         | Lovastatin 40 mg daily (as 2 doses) (n = 1646)       |        | Lovastatin 40 mg twice:<br>Baseline 259 ± 21<br>48 wks no data<br>change -24% ± 8 | Lovastatin 40 mg twice:<br>Baseline 181 ± 21<br>48 wks no data<br>change -34% ± 11 | Lovastatin 40 mg (as 2 doses):<br>Baseline 45 ± 11.9<br>48 wks no data<br>change +8.6% ± 13   | Lovastatin 40 mg twice:<br>Baseline 157 no SD<br>48 wks no data<br>change -16% no SD |                                                                                     |
|                         | Lovastatin 80 mg daily (as 2 doses) (n = 1649)       |        | Lovastatin 80 mg twice:<br>Baseline 258 ± 21<br>48 wks no data<br>change -29% ± 9 | Lovastatin 80 mg twice:<br>Baseline 180 ± 21<br>48 wks no data<br>change -40% ± 11 | Lovastatin 80 mg (as 2 doses):<br>Baseline 45.2 ± 12.6<br>48 wks no data<br>change +9.5% ± 13 | Lovastatin 80 mg twice:<br>Baseline 154 no SD<br>48 wks no data<br>change -19% no SD |                                                                                     |
|                         | Placebo (n = 1663)                                   |        | Placebo:<br>Baseline 257 ± 20<br>48 wks no data<br>change +0.7% ± 8               | Placebo:<br>Baseline 179 ± 20<br>48 wks no data<br>change +1.0% ± 11               | Placebo:<br>Baseline 44.8 ± 12<br>48 wks no data<br>change +2.0% ± 12                         | Placebo:<br>Baseline 156 no SD<br>48 wks no data<br>change +4.0\$ no SD              |                                                                                     |
|                         |                                                      |        |                                                                                   |                                                                                    |                                                                                               |                                                                                      |                                                                                     |

| Author 2                          | Treatments & daily dose (mg)                                                                                                                                                                                                                        | Units                                                                                                                | Total cholesterol                                                                                                                                                                | LDL cholesterol                                                                                                                                                         | HDL cholesterol                                                                                                                                                                    | Triglycerides                                                                                                                                                                | Significance testing                                                                                                                            |
|-----------------------------------|-----------------------------------------------------------------------------------------------------------------------------------------------------------------------------------------------------------------------------------------------------|----------------------------------------------------------------------------------------------------------------------|----------------------------------------------------------------------------------------------------------------------------------------------------------------------------------|-------------------------------------------------------------------------------------------------------------------------------------------------------------------------|------------------------------------------------------------------------------------------------------------------------------------------------------------------------------------|------------------------------------------------------------------------------------------------------------------------------------------------------------------------------|-------------------------------------------------------------------------------------------------------------------------------------------------|
| Brown et al<br>2001<br>(Abstract) | Rosuvastatin 5 mg<br>(n=123)                                                                                                                                                                                                                        | mmol/L                                                                                                               | Pravastatin 20 mg:<br>Baseline 7.09<br>12 wks no data                                                                                                                            | Pravastatin 20 mg:<br>Baseline 4.87;<br>12 wks no data                                                                                                                  | Pravastatin 20 mg:<br>Baseline 1.3<br>12 wks no data                                                                                                                               | Pravastatin 20 mg:<br>Baseline 2.01<br>12 wks no data                                                                                                                        | None reported                                                                                                                                   |
|                                   | Rosuvastatin 10 mg<br>(n=116)                                                                                                                                                                                                                       |                                                                                                                      | % change (SE) -18.5<br>(1.0)                                                                                                                                                     | % change (SE) 12 wks -<br>26.5 (1.3); 52 wks -31.5%<br>(1.5)                                                                                                            | % change (SE) 12 wks<br>8.3 (1.2); 52 wks 4.5%<br>(1.4)                                                                                                                            | % change (SE) 12 wks -<br>11.4 (2.5); 52 wks -<br>9.3% (2.7)                                                                                                                 |                                                                                                                                                 |
|                                   | Pravastatin 20 mg<br>(n=118)                                                                                                                                                                                                                        |                                                                                                                      | Simvastatin 20 mg:<br>Baseline 7.09<br>12 wks no data                                                                                                                            | Simvastatin 20 mg:<br>Baseline 4.86<br>12 wks no data                                                                                                                   | Simvastatin 20 mg:<br>Baseline 1.32<br>12 wks no data                                                                                                                              | Simvastatin 20 mg:<br>Baseline 1.99<br>12 wks no data                                                                                                                        |                                                                                                                                                 |
|                                   | Simvastatin 20 mg<br>(n=120)                                                                                                                                                                                                                        |                                                                                                                      | % change (SE) -23.8<br>(1.0)                                                                                                                                                     | % change (SE) 12 wks -<br>34.6 (1.3); 52 wks -37.9%<br>(1.4)                                                                                                            | % change (SE) 12 wks<br>8.8 (1.2); 52 wks 6.2%<br>(1.3)                                                                                                                            | % change (SE) 12 wks -<br>10.2 (2.5); 52 wks -<br>14.1% (2.6)                                                                                                                |                                                                                                                                                 |
|                                   | Rosuvastatin 5 mg:<br>Baseline 7.15<br>12 wks no data<br>% change (SE) -28.0<br>(1.0)                                                                                                                                                               |                                                                                                                      | Rosuvastatin 5 mg:<br>Baseline 4.84<br>12 wks no data<br>% change (SE) -39.1 (1.3);<br>52 wks -41.6% (1.4)                                                                       | Rosuvastatin 5 mg:<br>Baseline 1.31<br>12 wks no data<br>% change (SE) 12 wks<br>8.2 (1.2); 52 wks 4.5%<br>(1.3)                                                        | Rosuvastatin 5 mg:<br>Baseline 2.18<br>12 wks no data<br>% change (SE) 12 wks -<br>17.6 (2.5); 52 wks -<br>15.8% (2.6)                                                             |                                                                                                                                                                              |                                                                                                                                                 |
|                                   | Rosuvastatin 10 mg:<br>Baseline 7.05<br>12 wks no data<br>% change (SE) -33.4<br>(1.0)                                                                                                                                                              | Rosuvastatin 10 mg:<br>Baseline 4.84<br>12 wks no data<br>% change (SE) 12 wks -<br>47.4 (1.3); 52 wks -48%<br>(1.4) | Rosuvastatin 10 mg:<br>Baseline 1.29<br>12 wks no data<br>% change (SE) 12 wks<br>11.9 (1.2); 52 wks 7.6%<br>(1.3)                                                               | Rosuvastatin 10 mg:<br>Baseline 2.03<br>12 wks no data<br>% change (SE) 12 wks -<br>21.5 (2.5); 52 wks -<br>18.1% (2.7)                                                 |                                                                                                                                                                                    |                                                                                                                                                                              |                                                                                                                                                 |
| Byington et al, 1995              | Pravastatin 20 mg/day<br>(n= 75)<br>Placebo (n= 76)<br><br>Once daily evening.<br>Dose doubled if LDL<br>>2.84 mmol/L &<br>decreased to 10 mg if<br>LDL was <2.33 mmol/L<br>Number on different<br>doses:<br>10 mg 4%<br>20 mg 23.5%<br>40 mg 72.5% | mg/dL                                                                                                                | Pravastatin:<br>Baseline 236 ± SE 2.86<br>Mean1-3 yrs 186 ± SE<br>2.5<br>change -21%<br><br>Placebo:<br>Baseline 234 ± SE 2.33<br>Mean1-3 yrs 235 ± SE<br>2.47<br>change no data | Pravastatin:<br>Baseline 168 ± SE 2.2<br>Mean1-3 yrs 120 ± SE 2.2<br>change -28%<br><br>Placebo:<br>Baseline 164 ± SE 2.0<br>Mean1-3 yrs 167 ± SE 2.2<br>change no data | Pravastatin:<br>Baseline 42 ± SE 1.1<br>Mean1-3 yrs 41 ± SE<br>0.4<br>change no data<br><br>Placebo:<br>Baseline 40.5 ± SE 1.0<br>Mean1-3 yrs 40.1 ± SE<br>1.0.4<br>change no data | Pravastatin:<br>Baseline 160 ± SE 6.6<br>Mean1-3 yrs 155 ± SE<br>5.0<br>change -14%<br><br>Placebo:<br>Baseline 182 ± SE 11<br>Mean1-3 yrs 179 ± SE<br>5.0<br>change no data | Pravastatin significantly<br>more effective than<br>placebo at changing total<br>cholesterol, LDL &<br>triglycerides (p<0.001),<br>but not HDL. |

| Author 2          | Treatments & daily dose (mg)                                                                                | Units | Total cholesterol                                                                     | LDL cholesterol                                                                       | HDL cholesterol                                                         | Triglycerides                                                                | Significance testing                                                                                                                                                                            |
|-------------------|-------------------------------------------------------------------------------------------------------------|-------|---------------------------------------------------------------------------------------|---------------------------------------------------------------------------------------|-------------------------------------------------------------------------|------------------------------------------------------------------------------|-------------------------------------------------------------------------------------------------------------------------------------------------------------------------------------------------|
| Celis et al, 1994 | Pravastatin (n= 25)                                                                                         | mg/dL | NB 4 mth data provided<br>Pravastatin:<br>Baseline 277 ± 6                            | NB 4 mth data provided<br>Pravastatin:<br>Baseline 197 ± 6                            | NB 4 mth data provided<br>Pravastatin:<br>Baseline 48 ± 3               | NB 4 mth data provided<br>Pravastatin:<br>Baseline 166 ± 18                  |                                                                                                                                                                                                 |
|                   | Placebo (n= 25)                                                                                             |       | 4 mths 213 no SD (5.5 mmol/L)<br>change -22% no SD                                    | 4 mths 128 no SD (3.3 mmol/L)<br>absolute change -69                                  | 4 mths 49.5 no SD (1.28 mmol/L)<br>Absolute change +1.0                 | 4 mths unchanged                                                             |                                                                                                                                                                                                 |
|                   | Dose increased from 10 mg to 20 mg at end of mth 1 & to 40 mg at end of mth 2. Pts remained on 40 mg daily. |       | Placebo:<br>Baseline 285 ± 7<br>4 mths 282 no SD (7.3 mmol/L)<br>absolute change -3.0 | Placebo:<br>Baseline 200 ± 9<br>4 mths 193 no SD (5.0 mmol/L)<br>absolute change -7.0 | Placebo:<br>Baseline 51 ± 4<br>4 mths 51.8<br>absolute change +0.8      | Placebo:<br>Baseline 169 ± 22<br>4 mths unchanged                            |                                                                                                                                                                                                 |
| Chan et al, 1996  | Simvastatin 10 mg (n=38)                                                                                    | mg/dL | Simvastatin:<br>Baseline 281 ± 18; 12 mths 205 ± 15; change no data                   | Simvastatin:<br>Baseline 209 ± 12; 12 wks 207 ± 19; change no data                    | Simvastatin:<br>Baseline 49 ± 7.0; 12 wks 52.3 ± 7.9; change no data    | Simvastatin:<br>Baseline 115 ± 35; 12 wks 106 ± 25; change no data           | Significant change from baseline & from placebo with simvastatin 10 mg at 12 wks for total cholesterol, LDL and triglycerides but not HDL                                                       |
|                   | Placebo (n=38)                                                                                              |       | Placebo:<br>Baseline 286 ± 26; 12 wks 281 ± 22; change no data                        | Placebo:<br>Baseline 204 ± 22; 12 wks 207 ± 19; change no data                        | Placebo:<br>Baseline 48 ± 8; 12 wks 48.6 ± 7.7; change no data          | Placebo:<br>Baseline 126 ± 34; 12 wks 123 ± 29; change no data               |                                                                                                                                                                                                 |
|                   | Once daily evening                                                                                          |       |                                                                                       |                                                                                       |                                                                         |                                                                              |                                                                                                                                                                                                 |
| Chan et al, 1996  | Pravastatin 15 mg (n= 48)                                                                                   | mg/dL | Pravastatin:<br>Baseline 7.3 ± 0.5<br>12 mths 5.5 no SD<br>change -25% no SD          | Pravastatin:<br>Baseline 5.3 ± 0.5<br>12 mths 3.7 no SD<br>change -30.2% no SD        |                                                                         | Pravastatin:<br>Baseline 1.7 ± 0.4<br>12 mths 1.5 no SD<br>change -11% no SD |                                                                                                                                                                                                 |
|                   | Placebo (n= 48)                                                                                             |       | Placebo:<br>Baseline 7.2 ± 0.6<br>12 mths 6.9 no SD<br>change -5.1% no SD             | Placebo:<br>Baseline 5.4 ± 0.4<br>12 mths no data<br>change -7.6% no SD               |                                                                         | Placebo:<br>Baseline 1.6 ± 0.4<br>12 mths no data<br>change -2.6% no SD      |                                                                                                                                                                                                 |
|                   | Once in evening                                                                                             |       |                                                                                       |                                                                                       |                                                                         |                                                                              |                                                                                                                                                                                                 |
| Chan et al, 1996b | Pravastatin 10 mg (n= 25)                                                                                   | mg/dL | Pravastatin:<br>Baseline 284 ± 14; 20 wks 217 ± 15; change -23.5%                     | Pravastatin:<br>Baseline 207 ± 20; 20 wks 148 ± 16; change -28.5%                     | Pravastatin:<br>Baseline 46.4 ± 8.1<br>20 wks 49.5 ± 7.3<br>change 6.5% | Pravastatin:<br>Baseline 135 ± 46<br>20 wks 123 ± 28<br>change -9.1          | Significant change from baseline & from placebo with pravastatin 10 mg at 20 wks for total cholesterol & LDL (p<0.05). Significant changes from baseline only for triglycerides & HDL (p<0.05). |
|                   | Placebo (n=25)                                                                                              |       | Placebo:<br>Baseline 283 ± 20; 20 wks 274 ± 13; change -3.0%                          | Placebo:<br>Baseline 208 ± 22; 20 wks 200 ± 13; change -3.1%                          | Placebo:<br>Baseline 45.6 ± 8.8<br>20 wks 45.2 ± 8.2<br>change -0.5%    | Placebo:<br>Baseline 144 ± 46<br>20 wks 139 ± 27<br>change -0.2              |                                                                                                                                                                                                 |
|                   | Once daily evening                                                                                          |       |                                                                                       |                                                                                       |                                                                         |                                                                              |                                                                                                                                                                                                 |

| Author 2               | Treatments & daily dose (mg)                                                                                                                                                                                               | Units  | Total cholesterol                                                           | LDL cholesterol                                                             | HDL cholesterol                                                             | Triglycerides                                                               | Significance testing                                                                                                                                                                                             |
|------------------------|----------------------------------------------------------------------------------------------------------------------------------------------------------------------------------------------------------------------------|--------|-----------------------------------------------------------------------------|-----------------------------------------------------------------------------|-----------------------------------------------------------------------------|-----------------------------------------------------------------------------|------------------------------------------------------------------------------------------------------------------------------------------------------------------------------------------------------------------|
| Chan et al, 1995       | Pravastatin 10 mg (n= 30)                                                                                                                                                                                                  | mg/dL  | Pravastatin:<br>Baseline 279 ± 6<br>6 mths 222 no SD<br>Change -20% no SD   | Pravastatin:<br>Baseline 200 ± 9<br>6 mths 158 no SD<br>Change -25% no SD   | Pravastatin:<br>Baseline 47 ± 5<br>6 mths 49 no SD<br>Change +5% no SD      | Pravastatin:<br>Baseline 127 ± 18<br>6 mths 116 no SD<br>Change -8% no SD   | Pravastatin significantly more effective than placebo at reducing total cholesterol & LDL. No significant difference for other parameters                                                                        |
|                        | Placebo (n= 30)                                                                                                                                                                                                            |        | Placebo:<br>Baseline 285 ± 7<br>6 mths 283 no SD<br>Change no data          | Placebo:<br>Baseline 210 ± 8<br>6 mths 218 no SD<br>Change no data          | Placebo:<br>Baseline 46 ± 4<br>6 mths 49 no SD<br>Change no data            | Placebo:<br>Baseline 129 ± 22<br>6 mths 127 no SD<br>Change no data         |                                                                                                                                                                                                                  |
| Crepaldi et al, 1991   | Pravastatin (n= 193)<br><br>40 mg/day evening                                                                                                                                                                              | mmol/L | Pravastatin:<br>Baseline 9.2 ± 1.4<br>24 wks 7.0 ± 1.4<br>change -23% no SD | Pravastatin:<br>Baseline 7.2 ± 1.4<br>24 wks 5.1 ± 1.5<br>change -30% no SD | Pravastatin:<br>Baseline 1.2 ± 0.3<br>24 wks 1.3 ± 0.4<br>change +5% no SD  | Pravastatin:<br>Baseline 1.5 ± 0.5<br>24 wks 1.4 ± 0.5<br>change -5% no SD  | Significant reductions from baseline with pravastatin & gemfibrozil for all lipid parameters (p<0.01)                                                                                                            |
|                        |                                                                                                                                                                                                                            |        | Gemfibrozil:<br>Baseline 9.1 ± 1.4<br>24 wks 7.8 ± 1.6<br>change -14% no SD | Gemfibrozil:<br>Baseline 7.0 ± 1.5<br>24 wks 5.9 ± 1.7<br>change -16% no SD | Gemfibrozil:<br>Baseline 1.3 ± 0.3<br>24 wks 1.4 ± 0.4<br>change +13% no SD | Gemfibrozil:<br>Baseline 1.6 ± 0.6<br>24 wks 0.9 ± 0.4<br>change -13% no SD |                                                                                                                                                                                                                  |
| D'Agostino et al, 1992 | Lovastatin evening (n= 52)<br>Initial 20 mg dose wasdoubled after 6 wks if LDL > 160 mg/dL in stratum I or >130 mg/dL in stratum II<br><br>Gemfibrozil 1200 mg/day given as 600 mg twice (n= 52)<br>Dose remained constant | mg/dL  | Lovastatin:<br>Baseline 284<br>18 wks no data<br>absolute change -62        | Lovastatin:<br>Baseline 209<br>18 wks no data<br>absolute change -67        | Lovastatin:<br>Baseline 44<br>18 wks no data<br>absolute change +5          | Lovastatin:<br>Baseline 164<br>18 wks no data<br>absolute change -15        | Lovastatin significantly more effective than gemfibrozil at reducing total cholesterol & LDL (p<0.001)<br><br>Gemfibrozil significantly more effective than lovastatin at changing triglycerides & HDI (p<0.001) |
|                        |                                                                                                                                                                                                                            |        | Gemfibrozil:<br>Baseline 293<br>18 wks<br>absolute change -37               | Gemfibrozil:<br>Baseline 212<br>18 wks no data<br>absolute change -29       | Gemfibrozil:<br>Baseline 45<br>18 wks no data<br>absolute change +8         | Gemfibrozil:<br>Baseline 172<br>18 wks no data<br>absolute change -74       |                                                                                                                                                                                                                  |



| Author 2             | Treatments & daily dose (mg)                                                           | Units  | Total cholesterol                                                                           | LDL cholesterol                                                                               | HDL cholesterol                                                                             | Triglycerides                                                                                 | Significance testing                                                                                                                                |                                                                            |
|----------------------|----------------------------------------------------------------------------------------|--------|---------------------------------------------------------------------------------------------|-----------------------------------------------------------------------------------------------|---------------------------------------------------------------------------------------------|-----------------------------------------------------------------------------------------------|-----------------------------------------------------------------------------------------------------------------------------------------------------|----------------------------------------------------------------------------|
| Dart et al, 1997     | Atorvastatin 10 mg (n=132)<br>Dose doubled of LDL target not reached at wk 10 (64/132) | mmol/L | Atorvastatin:<br>Baseline 7.6 ± 0.1; 52 wks no data; change -30% ± SE 0.8                   | Atorvastatin:<br>Baseline 5.5 ± 0.1; 52 wks no data; change -38% ± SE 1.0                     | Atorvastatin:<br>Baseline 1.09 ± SE 0.02<br>52 wks no data<br>change +7 ± SE 1.4            | Atorvastatin:<br>Baseline 2.1 ± 0.1; 52 wks no data; change -21% ± SE 2.4                     | Significantly greater reduction in LDL, total cholesterol & triglycerides from baseline to 52 wks with atorvastatin than with simvastatin (p<0.005) |                                                                            |
|                      | Simvastatin 10 mg (n=45)<br>Dose doubled of LDL target not reached at wk 10 (28/45)    |        | Simvastatin:<br>Baseline 7.3 ± 0.2; 52 wks no data; change -25% ± SE 1.3                    | Simvastatin:<br>Baseline 5.4 ± 0.1; 52 wks no data; change -33% ± SE 1.5                      | Simvastatin:<br>Baseline 1.03 ± SE 0.03<br>52 wks no data<br>change +7 ± SE 2.2             | Simvastatin:<br>Baseline 2.0 ± 0.1; 52 wks no data; change -12% ± SE 3.8                      |                                                                                                                                                     |                                                                            |
|                      | Completed 95%                                                                          |        |                                                                                             |                                                                                               |                                                                                             |                                                                                               |                                                                                                                                                     |                                                                            |
| Davidson et al, 1991 | Prvastatin 40 mg (n=26)                                                                | mmol/L | Prvastatin:<br>Baseline 7.52 ± SEM 0.2<br>16 wks 5.7 ± SEM 0.2<br>change -24% ± SEM 2.1     | Prvastatin:<br>Baseline 5.43 ± SEM 0.19<br>16 wks 3.7 ± SEM 0.17<br>change -32% ± SEM 2.4     | Prvastatin:<br>Baseline 1.1 ± SEM 0.04<br>16 wks 1.16 ± SEM 0.05<br>change +8.9 ± SEM 4.2   | Prvastatin:<br>Baseline 1.88 ± SEM 0.17<br>16 wks 1.55 ± SEM 0.16<br>change -17.6% ± SEM 5.33 | Significant change in total cholesterol, LDL, HDL & triglycerides with pravastatin or combination therapy (p<0.05)                                  |                                                                            |
|                      | Placebo (n= 27)                                                                        |        | ProbucoI:<br>Baseline 7.73 ± SEM 0.24<br>16 wks 6.7 ± SEM 0.25<br>change -12.6% ± SEM 2.3   | ProbucoI:<br>Baseline 5.67 ± SEM 0.24<br>16 wks 4.94 ± SEM 0.24<br>change -11.2% ± SEM 3.1    | ProbucoI:<br>Baseline 1.14 ± SEM 0.05<br>16 wks 0.82 ± SEM 0.06<br>change -26.1% ± SEM 2.7  | ProbucoI:<br>Baseline 1.68 ± SEM 0.14<br>16 wks 1.62 ± SEM 0.15<br>change -6.36% ± SEM 5.92   |                                                                                                                                                     | Significant change in total cholesterol, LDL, & HDL with probucoI (p<0.05) |
|                      | Pravastatin + probucoI (n= 29)                                                         |        | Placebo:<br>Baseline 7.28 ± SEM 0.14<br>16 wks 7.05 ± SEM 0.22<br>change -3.3% ± SEM 2.7    | Placebo:<br>Baseline 5.13 ± SEM 0.13<br>16 wks 4.97 ± SEM 0.18<br>change -3.46% — SEM 3.49    | Placebo:<br>Baseline 1.26 ± SEM 0.07<br>16 wks 1.20 ± SEM 0.06<br>change -1.5% ± SEM 3.8    | Placebo:<br>Baseline 1.65 ± SEM 0.15<br>16 wks 1.66 ± SEM 0.15<br>change -3.13% ± SEM 6.4     | No significant change for any outcome with placebo.                                                                                                 |                                                                            |
|                      | ProbucoI 1000 mg (n= 29)                                                               |        | Combination:<br>Baseline 7.5 ± SEM 0.24<br>16 wks 5.0 ± SEM 0.15<br>change -33.2% ± SEM 1.8 | Combination:<br>Baseline 5.27 ± SEM 0.21<br>16 wks 3.29 ± SEM 0.14<br>change -37.5% ± SEM 2.2 | Combination:<br>Baseline 1.25 ± SEM 0.06<br>16 wks 0.92 ± SEM 0.05<br>change -24% ± SEM 2.9 | Combination:<br>Baseline 1.83 ± SEM 0.17<br>16 wks 1.43 ± SEM 0.13<br>change -22.8% ± SEM 4.9 |                                                                                                                                                     | Pravastatin was significantly more effective than probucoI (p<0.05)        |
|                      | All other treatments given once daily evening                                          |        |                                                                                             |                                                                                               |                                                                                             |                                                                                               |                                                                                                                                                     |                                                                            |

| Author 2                                | Treatments & daily dose (mg)                                             | Units                                                         | Total cholesterol                                                            | LDL cholesterol                                                                 | HDL cholesterol                                                          | Triglycerides                                                            | Significance testing                                                                                                                                                                                                                                                                                                                                                                                                         |
|-----------------------------------------|--------------------------------------------------------------------------|---------------------------------------------------------------|------------------------------------------------------------------------------|---------------------------------------------------------------------------------|--------------------------------------------------------------------------|--------------------------------------------------------------------------|------------------------------------------------------------------------------------------------------------------------------------------------------------------------------------------------------------------------------------------------------------------------------------------------------------------------------------------------------------------------------------------------------------------------------|
| Davidson et al, 1997                    | Atorvastatin 10 mg (n= 707)                                              | mmol/L                                                        | Atorvastatin:<br>Baseline 7.1 ± SE 0.03<br>16 wks no data                    | Atorvastatin:<br>Baseline 5.0 ± SE 0.02<br>16 wks no data                       | Atorvastatin:<br>Baseline 1.3 ± 0.01<br>16 wks no data                   | Atorvastatin:<br>Baseline 2.0 ± 0.03<br>16 wks no data                   | Atorvastatin 10 mg significantly more effective than lovastatin 20 mg at reducing total cholesterol, triglycerides & LDL (p<0.05)                                                                                                                                                                                                                                                                                            |
|                                         | Lovastatin 20 mg (n= 191)                                                |                                                               | change -27% ± 0.4                                                            | change -36% ± SE 0.5                                                            | change +7% ± 0.5                                                         | change -17% ± 1.1                                                        |                                                                                                                                                                                                                                                                                                                                                                                                                              |
|                                         | Placebo (n=133) - cannot use placebo data as no baseline lipids provided |                                                               | Lovastatin:<br>Baseline 7.1 ± SE 0.05<br>16 wks no data<br>change -19% ± 0.6 | Lovastatin:<br>Baseline 4.9 ± SE 0.04<br>16 wks no data<br>change -27% ± SE 0.8 | Lovastatin:<br>Baseline 1.3 ± 0.02<br>16 wks no data<br>change +7% ± 0.9 | Lovastatin:<br>Baseline 2.1 ± 0.05<br>16 wks no data<br>change -6% ± 1.9 |                                                                                                                                                                                                                                                                                                                                                                                                                              |
| Davidson et al. 2001                    | Rosuvastatin 5 mg (n=129)                                                | mmol/L                                                        | Placebo:<br>Baseline 7.06 SD ± 0.71<br>12 wks no data                        | Placebo:<br>Baseline 4.83 SD ± 0.54;<br>12 wks no data                          | Placebo:<br>Baseline 1.26 SD ± 0.29<br>12 wks no data                    | Placebo:<br>Baseline 2.11 ± 0.74<br>12 wks no data                       | Significantly greater improvement in LDL with rosuvastatin 5 mg (p<0.01) or 10 mg (p<0.001) than with atorvastatin. Significantly greater improvement in total cholesterol with rosuvastatin 5 mg or 10 mg (p<0.05) than with atorvastatin. Significantly greater improvement in HDL with rosuvastatin 5 mg (p<0.01) or 10 mg (p<0.001) than with atorvastatin. No significant differences between groups for triglycerides. |
| Now published as [Davidson et al, 2002] | Rosuvastatin 10 mg (n=130)                                               |                                                               | % change (SE) 0 (0.9)                                                        | % change (SE) 0 (1.2)                                                           | % change (SE) +4 (1.0)                                                   | % change (SE) -1 (2.3)                                                   |                                                                                                                                                                                                                                                                                                                                                                                                                              |
|                                         | Placebo (n=132)                                                          |                                                               | Rosuvastatin 5 mg:<br>Baseline 7.18 ± 0.61<br>12 wks no data                 | Rosuvastatin 5 mg:<br>Baseline 4.87 ± 0.50<br>12 wks no data                    | Rosuvastatin 5 mg:<br>Baseline 1.36 ± 0.32<br>12 wks no data             | Rosuvastatin 5 mg:<br>Baseline 2.10 ± 0.87<br>12 wks no data             |                                                                                                                                                                                                                                                                                                                                                                                                                              |
|                                         | Atorvastatin 10 mg (n=128)                                               |                                                               | % change (SE) -28 (1.0)                                                      | % change (SE) -40 (1.3)                                                         | % change (SE) +13 (1.0)                                                  | % change (SE) -17 (2.4)                                                  |                                                                                                                                                                                                                                                                                                                                                                                                                              |
|                                         |                                                                          | Rosuvastatin 10 mg:<br>Baseline 7.03 ± 0.59<br>12 wks no data | Rosuvastatin 10 mg:<br>Baseline 4.77 ± 0.44<br>12 wks no data                | Rosuvastatin 10 mg:<br>Baseline 1.28 ± 0.29<br>12 wks no data                   | Rosuvastatin 10 mg:<br>Baseline 2.13 ± 0.75<br>12 wks no data            |                                                                          |                                                                                                                                                                                                                                                                                                                                                                                                                              |
|                                         |                                                                          | % change (SE) -30 (1.0)                                       | % change (SE) -43 (1.3)                                                      | % change (SE) +12 (1.0)                                                         | % change (SE) -19 (2.4)                                                  |                                                                          |                                                                                                                                                                                                                                                                                                                                                                                                                              |
|                                         |                                                                          | Atorvastatin 10 mg:<br>Baseline 7.04 ± 0.64<br>12 wks no data | Atorvastatin 10 mg:<br>Baseline 4.80 ± 0.51<br>12 wks no data                | Atorvastatin 10 mg:<br>Baseline 1.30 ± 0.30<br>12 wks no data                   | Atorvastatin 10 mg:<br>Baseline 2.06 ± 0.81<br>12 wks no data            |                                                                          |                                                                                                                                                                                                                                                                                                                                                                                                                              |
|                                         |                                                                          | % change (SE) -25 (1.0)                                       | % change (SE) -35 (1.3)                                                      | % change (SE) +8 (1.0)                                                          | % change (SE) -19 (2.4)                                                  |                                                                          |                                                                                                                                                                                                                                                                                                                                                                                                                              |

| Author 2                | Treatments & daily dose (mg) | Units               | Total cholesterol                                       | LDL cholesterol                                         | HDL cholesterol                                        | Triglycerides                                           | Significance testing                                                                                                 |
|-------------------------|------------------------------|---------------------|---------------------------------------------------------|---------------------------------------------------------|--------------------------------------------------------|---------------------------------------------------------|----------------------------------------------------------------------------------------------------------------------|
| Dobs et al, 2000        | Simvastatin 20 mg (n= 40)    | mg/dL               | Simvastatin 20 mg: Baseline 262 no SD<br>24 wks no data | Simvastatin 20 mg: Baseline 186 no SD<br>24 wks no data | Simvastatin 20 mg: Baseline 44 no SD<br>24 wks no data | Simvastatin 20 mg: Baseline 191 no SD<br>24 wks no data | All active treatments were significantly better at reducing total cholesterol, LDL, triglycerides & HDL than placebo |
|                         | Simvastatin 40 mg: (n= 41 )  |                     | Change -25.8% ± 8.5                                     | Change -33.1% ± 10.5                                    | Change +7.9% ± 12.2                                    | Change -24.6% ± 23/1                                    |                                                                                                                      |
|                         | Pravastatin 40 mg (n= 39)    |                     | Simvastatin 40 mg: Baseline 258 no SD<br>24 wks no data | Simvastatin 40 mg: Baseline 183 no SD<br>24 wks no data | Simvastatin 40 mg: Baseline 39 no SD<br>24 wks no data | Simvastatin 40 mg: Baseline 211 no SD<br>24 wks no data |                                                                                                                      |
|                         | Placebo (n= 39)              |                     | Change -26.8% ± 12.3                                    | Change -34.3% ± 15.4                                    | Change +5.0% ± 13.0                                    | Change -14.5% ± 27.4                                    |                                                                                                                      |
|                         | Given once daily             |                     | Pravastatin 40 mg: Baseline 251 no SD<br>24 wks no data | Pravastatin 40 mg: Baseline 182 no SD<br>24 wks no data | Pravastatin 40 mg: Baseline 42 no SD<br>24 wks no data | Pravastatin 40 mg: Baseline 156 no SD<br>24 wks no data |                                                                                                                      |
|                         | Change -23.6% ± 10.3         |                     | Change -30.1% ± 12.6                                    | Change +2.5% ± 12.3                                     | Change -15.7% ± 46.6                                   |                                                         |                                                                                                                      |
| Number completed study: |                              | Placebo:            | Placebo:                                                | Placebo:                                                | Placebo:                                               |                                                         |                                                                                                                      |
| Sim 20 mg 37            |                              | Baseline 262 no SD  | Baseline 186 no SD                                      | Baseline 41 no SD                                       | Baseline 214 no SD                                     |                                                         |                                                                                                                      |
| Sim 40 mg 34            |                              | 24 wks no data      | 24 wks no data                                          | 24 wks no data                                          | 24 wks no data                                         |                                                         |                                                                                                                      |
| Prav 40 mg 37           |                              | Change -1.0% ± 10.4 | Change +0.6% ± 12.1                                     | Change -5.4% ± 11.1                                     | Change +5.7% ± 46.6                                    |                                                         |                                                                                                                      |
| Placebo 30              |                              |                     |                                                         |                                                         |                                                        |                                                         |                                                                                                                      |

| Author 2                                     | Treatments & daily dose (mg) | Units | Total cholesterol | LDL cholesterol                                                                      | HDL cholesterol | Triglycerides                                                                           | Significance testing                                                                                                                           |                                                                                                                                                         |
|----------------------------------------------|------------------------------|-------|-------------------|--------------------------------------------------------------------------------------|-----------------|-----------------------------------------------------------------------------------------|------------------------------------------------------------------------------------------------------------------------------------------------|---------------------------------------------------------------------------------------------------------------------------------------------------------|
| Farnier & the Cerivastatin Study Group, 1998 | Cerivastatin 0.1 mg (n=166)  | mg/dL |                   | Cerivastatin 0.1 mg:mg/dL<br>Baseline 201.0 ± 37.6<br>16 wk no data<br>change -15.1% | No data         | Cerivastatin 0.1 mg (mg/dL):<br>Baseline 281.5 ± 67.2<br>16 wk no data<br>change -14.8% | Significant benefit over placebo for change from baseline in LDL cholesterol for all doses of cerivastatin (p<0.001) and gemfibrozil (p<0.05). |                                                                                                                                                         |
|                                              | Gemfibrozil 1200 mg (n=160)  |       |                   | Cerivastatin 0.2 mg:<br>Baseline 195.7 ± 33.6<br>16 wk no data<br>change -23.0%      |                 | Cerivastatin 0.2 mg:<br>Baseline 272.0 ± 63.3<br>16 wk no data<br>change -11.7%         |                                                                                                                                                | Significant change in triglyceride compared with placebo with all doses of cerivastatin (0.1 or 0.3 mg p<0.05; 0.2 mg p<0.01) and gemfibrozil (p<0.05). |
|                                              | Placebo (n=79)               |       |                   | Cerivastatin 0.3 mg:<br>Baseline 200.6 ± 30.3<br>16 wk no data<br>change -24.2       |                 | Cerivastatin 0.3 mg:<br>Baseline 276.1 ± 80.0<br>16 wk no data<br>change -20.3%         |                                                                                                                                                |                                                                                                                                                         |
|                                              |                              |       |                   | Gemfibrozil 1200 mg:<br>Baseline 201.7 ± 37.6<br>16 wk no data<br>change -7.5 %      |                 | Gemfibrozil:<br>Baseline 275.9 ± 81.1<br>16 wk no data<br>change -50.3%                 |                                                                                                                                                | No significant difference between groups or doses for adverse events.                                                                                   |
|                                              |                              |       |                   | Placebo:<br>Baseline 199.5 ± 34.3<br>16 wk no data<br>change -0.6 %                  |                 | Placebo:<br>Baseline ?<br>16 wk ?<br>change +2.1%                                       |                                                                                                                                                |                                                                                                                                                         |

| Author 2            | Treatments & daily dose (mg)                                                                                                                                                                                                                                                    | Units  | Total cholesterol                                                                                                                                         | LDL cholesterol                                                                                                                                           | HDL cholesterol                                                                                                                                             | Triglycerides                                                                                                                                                   | Significance testing                                                                                                                                                                                                                                                                                                   |
|---------------------|---------------------------------------------------------------------------------------------------------------------------------------------------------------------------------------------------------------------------------------------------------------------------------|--------|-----------------------------------------------------------------------------------------------------------------------------------------------------------|-----------------------------------------------------------------------------------------------------------------------------------------------------------|-------------------------------------------------------------------------------------------------------------------------------------------------------------|-----------------------------------------------------------------------------------------------------------------------------------------------------------------|------------------------------------------------------------------------------------------------------------------------------------------------------------------------------------------------------------------------------------------------------------------------------------------------------------------------|
| Farnier et al, 1992 | Simvastatin 10-40 mg daily (n= 82)<br>Dose doubled from 10 mg after 6 wks & to 40 mg after 12 wks if total cholesterol >5.2 mmol/L<br>Doses taken at wk 18:<br>10 mg 11/82<br>20 mg 20/82<br>40 mg 51/82<br><br>Ciprofibrate 100 mg daily (n= 82)<br>Dose maintained throughout | mmol/L | Simvastatin:<br>Baseline 8.7 ± 1.8<br>18 wks no data<br>change -30% ± 13<br><br>Ciprofibrate:<br>Baseline 8.3 ± 1.7<br>18 wks no data<br>change -16% ± 15 | Simvastatin:<br>Baseline 6.6 ± 1.8<br>18 wks no data<br>change -41% ± 11<br><br>Ciprofibrate:<br>Baseline 6.4 ± 1.8<br>18 wks no data<br>change -20% ± 18 | Simvastatin:<br>Baseline 1.4 ± 0.4<br>18 wks no data<br>change +8.2% ± 23<br><br>Ciprofibrate:<br>Baseline 1.3 ± 0.4<br>18 wks no data<br>change +9.7% ± 18 | Simvastatin:<br>Baseline 1.7 ± 1.1<br>18 wks no data<br>change -11% ± no SD<br><br>Ciprofibrate:<br>Baseline 1.8 ± 0.8<br>18 wks no data<br>change -34% ± no SD | Simvastatin significantly better at reducing total & LDL cholesterol than ciprofibrate (p<0.01).<br><br>Ciprofibrate significantly better at reducing triglycerides than simvastatin (p<0.01).<br><br>No significant difference between treatments for HDL.                                                            |
| Fogari et al, 1997  | Pravastatin 20 mg (n=106)<br>Once daily<br><br>Acipimox 750 (n=106)<br>250 mg given 3 x daily                                                                                                                                                                                   | mg/dL  | Pravastatin:<br>Baseline 265 ± 33<br>12 wks 204 ± 34<br>change no data<br><br>Acipimox:<br>Baseline 265 ± 33<br>12 wks 225 ± 33<br>change no data         | Pravastatin:<br>Baseline 173 ± 30<br>12 wks 119 ± 28<br>change no data<br><br>Acipimox:<br>Baseline 171 ± 29<br>12 wks 142 ± 28<br>change no data         | Pravastatin:<br>Baseline 38 ± 7.6<br>12 wks 40 ± 8.0<br>change no data<br><br>Acipimox:<br>Baseline 38 ± 7.5<br>12 wks 44 ± 9.7<br>change no data           | Pravastatin:<br>Baseline 287 ± 102<br>12 wks 237 ± 89<br>change no data<br><br>Acipimox:<br>Baseline 292 ± 101<br>12 wks 192 ± 66<br>change no data             | Pravastatin: significant change from baseline for all lipids & triglycerides (p<0.0001). Significantly better than acipimox for total & LDL cholesterol (p<0.01).<br><br>Acipimox: significant change from baseline for all lipids & triglycerides (p<0.0001). Significantly better than pravastatin for HDL (p<0.01). |

| Author 2                | Treatments & daily dose (mg)                           | Units  | Total cholesterol                                                                   | LDL cholesterol                                                                     | HDL cholesterol                                                                     | Triglycerides                                                                       | Significance testing                                                               |  |
|-------------------------|--------------------------------------------------------|--------|-------------------------------------------------------------------------------------|-------------------------------------------------------------------------------------|-------------------------------------------------------------------------------------|-------------------------------------------------------------------------------------|------------------------------------------------------------------------------------|--|
| Frederiksen et al, 1993 | Pravastatin 20 mg (n= 110)                             | mmol/L | Pravastatin 20/40 mg:<br>Baseline 7.0 ± 0.6<br>26 wks 5.9 ± 0.8<br>change no data   | Pravastatin 20/40 mg:<br>Baseline 4.9 ± 0.6<br>26 wks 3.8 ± 0.8<br>change no data   | Pravastatin:<br>Baseline 1.32 ± 0.35<br>26 wks 1.40 ± 0.4<br>change 0.08 no SD      | Pravastatin 20/40 mg:<br>Baseline 1.8 ± 0.9<br>26 wks 1.6 ± 0.8<br>change no data   |                                                                                    |  |
|                         | Pravastatin 40 mg (n=67)                               |        | Placebo:<br>Baseline 7.0 ± 0.6<br>26 wks 7.3 ± 0.8<br>change no data                | Placebo:<br>Baseline 5.0 ± 0.6<br>26 wks 5.3 ± 0.8<br>change no data                | Placebo:<br>Baseline 1.34 ± 0.38<br>26 wks 1.38 ± 0.38<br>change 0.04 no SD         | Placebo:<br>Baseline 1.7 ± 0.8<br>26 wks 1.5 ± 0.6<br>change no data                |                                                                                    |  |
|                         | Both groups analysed together                          |        |                                                                                     |                                                                                     |                                                                                     |                                                                                     |                                                                                    |  |
|                         | Placebo (n= 96)                                        |        |                                                                                     |                                                                                     |                                                                                     |                                                                                     |                                                                                    |  |
| Frohlich et al, 1993    | Lovastatin Stratum I (n= 77)                           | mmol/L | Lovastatin Stratum I:<br>Baseline 7.1 ± 0.5<br>18 wks 5.2 ± 0.7<br>change no data   | Lovastatin Stratum I:<br>Baseline 5.2 ± 0.6<br>18 wks 3.4 ± 0.6<br>change no data   | Lovastatin Stratum I:<br>Baseline 1.1 ± 0.3<br>18 wks 1.1 ± 0.3<br>change no data   | Lovastatin Stratum I:<br>Baseline 2.0 ± 0.9<br>18 wks 1.7 ± 0.8<br>change no data   |                                                                                    |  |
|                         | Lovastatin StratumII (n= 72)                           |        | Lovastatin Stratum II:<br>Baseline 9.2 ± 1.3<br>18 wks 9.4 ± 1.4<br>change no data  | Lovastatin Stratum II:<br>Baseline 7.3 ± 1.4<br>18 wks 4.6 ± 1.4<br>change no data  | Lovastatin Stratum II:<br>Baseline 1.12 ± 0.3<br>18 wks 1.2 ± 0.3<br>change no data | Lovastatin Stratum II:<br>Baseline 1.9 ± 0.8<br>18 wks 1.5 ± 0.7<br>change no data  |                                                                                    |  |
|                         | 20 / 40/ 80mg daily                                    |        | Simvastatin Stratum I (n= 74)                                                       | Simvastatin Stratum I:<br>Baseline 7.1 ± 0.6<br>18 wks 5.2 ± 0.6<br>change no data  | Simvastatin Stratum I:<br>Baseline 5.2 ± 0.5<br>18 wks 3.4 ± 0.6<br>change no data  | Simvastatin Stratum I:<br>Baseline 1.2 ± 0.3<br>18 wks 1.2 ± 0.3<br>change no data  | Simvastatin Stratum I:<br>Baseline 2.1 ± 0.9<br>18 wks 1.7 ± 0.8<br>change no data |  |
|                         | Simvastatin Stratum II (n= 75)                         |        | Simvastatin Stratum II:<br>Baseline 9.4 ± 1.4<br>18 wks 6.5 ± 1.1<br>change no data | Simvastatin Stratum II:<br>Baseline 7.5 ± 1.6<br>18 wks 4.7 ± 1.2<br>change no data | Simvastatin Stratum II:<br>Baseline 1.1 ± 0.3<br>18 wks 1.2 ± 0.3<br>change no data | Simvastatin Stratum II:<br>Baseline 1.9 ± 0.9<br>18 wks 1.5 ± 0.7<br>change no data |                                                                                    |  |
|                         | 10 / 20 / 40 mg daily                                  |        |                                                                                     |                                                                                     |                                                                                     |                                                                                     |                                                                                    |  |
|                         | Dose doubled if total cholesterol >5.2 at 6 and 12 wks |        |                                                                                     |                                                                                     |                                                                                     |                                                                                     |                                                                                    |  |

| Author 2             | Treatments & daily dose (mg)                                                                                                                                                                | Units | Total cholesterol                                                                                                                                       | LDL cholesterol                                                                                                                                        | HDL cholesterol                                                                                                                                       | Triglycerides                                                                                                                                           | Significance testing                                                                                                                                     |
|----------------------|---------------------------------------------------------------------------------------------------------------------------------------------------------------------------------------------|-------|---------------------------------------------------------------------------------------------------------------------------------------------------------|--------------------------------------------------------------------------------------------------------------------------------------------------------|-------------------------------------------------------------------------------------------------------------------------------------------------------|---------------------------------------------------------------------------------------------------------------------------------------------------------|----------------------------------------------------------------------------------------------------------------------------------------------------------|
| Giannini et al, 1994 | Pravastatin (n=not stated, assume 24)<br>Dose increased from 10 mg to 20 mg to 60 mg/day<br><br>Lovastatin (n=not stated, assume 24)<br><br>Dose increased from 20 mg to 40 mg to 80 mg/day | md/dL | Pravastatin:<br>Baseline 298 ± 31<br>18 wks 227 ± 33<br>change no data<br><br>Lovastatin:<br>Baseline 302 ± 42<br>18 wks 207 ± 39<br>change no data     | Pravastatin:<br>Baseline 215 ± 33<br>18 wks 148 ± 32<br>change no data<br><br>Lovastatin:<br>Baseline 226 ± 51<br>18 wks 124 ± 37<br>change no data    | Pravastatin:<br>Baseline 46 ± 13<br>18 wks 53 ± 16<br>change no data<br><br>Lovastatin:<br>Baseline 50 ± 11<br>18 wks 56 ± 12<br>change no data       | Pravastatin:<br>Baseline 172 ± 56<br>18 wks 138 ± 46<br>change no data<br><br>Lovastatin:<br>Baseline 160 ± 68<br>18 wks 120 ± 50<br>change no data     |                                                                                                                                                          |
| Greten et al, 1994   | Fluvastatin 40 mg daily (n= 64)<br><br>Bezafibrate 400 mg daily (n= 67)                                                                                                                     | mg/dL | Fluvastatin:<br>Baseline 353 ± 89<br>12 wks no data<br>change -17.% ± 10<br><br>Bezafibrate:<br>Baseline 340 ± 77<br>12 wks no data<br>change -13% ± 12 | Fluvastatin:<br>Baseline 269 ± 89<br>12 wks no data<br>change -23% ± 12<br><br>Bezafibrate:<br>Baseline 257 ± 76<br>12 wks no data<br>change -17% ± 15 | Fluvastatin:<br>Baseline 55 ± 12<br>12 wks no data<br>change +2.3% ± 14<br><br>Bezafibrate:<br>Baseline 55 ± 13<br>12 wks no data<br>change +12% ± 15 | Fluvastatin:<br>Baseline 143 ± 48<br>12 wks no data<br>change -2.2% ± 35<br><br>Bezafibrate:<br>Baseline 138 ± 59<br>12 wks no data<br>change -28% ± 26 | Significant change from baseline in total cholesterol & LDL with fluvastatin & bezafibrate, also for HDL & triglycerides with bezafibrate only (p<0.01). |
| Guillen et al, 1995  | Pravastatin 10 mg (n= 76 analysed)<br><br>Placebo (n= 74 analysed)<br><br>Dose doubled if LDL targets not reached after 10-12 wks                                                           | mg/dL | Pravastatin:<br>Baseline 233 ± 15<br>26 wks 205 ± 31<br>change -12%<br><br>Placebo:<br>Baseline 234 ± 14<br>26 wks 233 ± 34<br>change -0.4%             | Pravastatin:<br>Baseline 157 ± 17<br>26 wks 125 ± 29<br>change -20%<br><br>Placebo:<br>Baseline 156 ± 18<br>26 wks 158 ± 36<br>change +1.2%            | Pravastatin:<br>Baseline 42 ± 12<br>26 wks 45 ± 10<br>change +7.6%<br><br>Placebo:<br>Baseline 43 ± 10<br>26 wks 45 ± 12<br>change +3.7%              | Pravastatin:<br>Baseline 171 ± 59<br>26 wks 164 ± 74<br>change -3.7%<br><br>Placebo:<br>Baseline 162 ± 59<br>26 wks 158 ± 74<br>change -2.4%            |                                                                                                                                                          |

| Author 2            | Treatments & daily dose (mg)                                                 | Units                                               | Total cholesterol                                             | LDL cholesterol                                               | HDL cholesterol                                                                                               | Triglycerides                                                            | Significance testing                                                                                          |
|---------------------|------------------------------------------------------------------------------|-----------------------------------------------------|---------------------------------------------------------------|---------------------------------------------------------------|---------------------------------------------------------------------------------------------------------------|--------------------------------------------------------------------------|---------------------------------------------------------------------------------------------------------------|
| Haffner et al, 1995 | Simvastatin 10 mg in evening (n= 88)                                         | mg/dL                                               | Simvastatin 10 mg pm: Baseline 278 ± SE 3.0<br>24 wks no data | Simvastatin 10 mg pm: Baseline 195 ± SE 2.7<br>24 wks no data | Simvastatin 10 mg pm: Baseline 50.9 ± SE 1.5<br>24 wks no data                                                | Simvastatin 10 mg pm: Baseline 141 (95% CI 130 to 155)<br>24 wks no data | Change from baseline to 24 wks was significantly difference for all doses of simvastatin but not placebo      |
|                     | Simvastatin 20 mg in morning (n= 83)                                         |                                                     | change -55.2 ± 3.36 (-19.9%)                                  | change -57.4 ± SE 3.0 (-27.6%)                                | change 2.2 ± SE 0.7 (+4.3%)                                                                                   | change -19.2 ± 6.5 (-13.6%)                                              |                                                                                                               |
|                     | Simvastatin 20 mg in evening (n= 86)                                         |                                                     | Simvastatin 20 mg am: Baseline 281 ± SE 3.1<br>24 wks no data | Simvastatin 20 mg am: Baseline 194 ± SE 2.8<br>24 wks no data | Simvastatin 20 mg am: Baseline 50.9 ± SE 1.5<br>24 wks no data                                                | Simvastatin 20 mg am: Baseline 162 (95% CI 146 to 179)<br>24 wks no data |                                                                                                               |
|                     | Placebo (n= 86)                                                              |                                                     | change -58.5 ± 3.5 (-20.9%)                                   | change -56.5 ± SE 3.1 (-28.1%)                                | change 2.7 ± SE 0.8 (+5.3%)                                                                                   | change -25.7 ± 6.7 (-15.9%)                                              |                                                                                                               |
|                     |                                                                              |                                                     | Simvastatin 20 mg pm: Baseline 279 ± SE 3.1<br>24 wks no data | Simvastatin 20 mg pm: Baseline 193 ± SE 2.8<br>24 wks no data | Simvastatin 20 mg pm: Baseline 52 ± SE 1.5<br>24 wks no data                                                  | Simvastatin 20 mg pm: Baseline 161 (95% CI 146 to 179)<br>24 wks no data |                                                                                                               |
|                     | change -68.8 ± 3.4 (-24.7%)                                                  | change -60 ± SE 3.0 (-34.3%)                        | change 1.3 ± SE 0.8 (+2.5%)                                   | change -21.3 ± 6.6 (-13.2%)                                   |                                                                                                               |                                                                          |                                                                                                               |
|                     | Placebo: Baseline 279 ± SE 3.0<br>24 wks no data                             | Placebo: Baseline 194 ± SE 2.7<br>24 wks no data    | Placebo: Baseline 52.2 ± SE 1.5<br>24 wks no data             | Placebo: Baseline 148 (95% CI 134 to 164)<br>24 wks no data   | Both treatments: significant change from baseline for all lipid levels (p<0.001 except HDI which was p<0.01). |                                                                          |                                                                                                               |
|                     | change +4.4 ± 3.4 (+1.5%)                                                    | change 3.1 ± SE 3.0 (+1.6%)                         | change 1.5 ± SE 0.7 (+2.8%)                                   | change -0.4 ± SE 6.5 (-0.3%)                                  |                                                                                                               |                                                                          |                                                                                                               |
| Hagen et al, 1994   | Fluvastatin 20/40 mg (n= 100)<br>20 mg dose doubled after 6 wks on treatment | mg/dL                                               | Fluvastatin: Baseline 325 ± 58<br>12 wks no data              | Fluvastatin: Baseline 249 ± 59<br>12 wks no data              | Fluvastatin: Baseline 49 ± 13<br>12 wks no data                                                               | Fluvastatin: Baseline 132 ± 54<br>12 wks no data                         | Both treatments: significant change from baseline for all lipid levels (p<0.001 except HDI which was p<0.01). |
|                     | Cholestyramine 4/8 g (n=48)<br>4 g dose doubled after 1 wk on treatment      |                                                     | change -22% ± 8.8                                             | change -28% ± 11                                              | change +3.7% ± 11                                                                                             | change -11% ± 29                                                         |                                                                                                               |
|                     | Cholestyramine: Baseline 325 ± 46<br>12 wks no data                          | Cholestyramine: Baseline 247 ± 46<br>12 wks no data | Cholestyramine: Baseline 50 ± 12<br>12 wks no data            | Cholestyramine: Baseline 137 ± 55<br>12 wks no data           | Cholestyramine significantly more effective at reducing total & LDL cholesterol than fluvastatin (p<0.001).   |                                                                          |                                                                                                               |
|                     | change -25% ± 11                                                             | change -35% ± 14                                    | change +3.7% ± 12                                             | change +12% ± 3.0                                             |                                                                                                               |                                                                          |                                                                                                               |



| Author 2                                                      | Treatments & daily dose (mg)                                                                                                                                                          | Units  | Total cholesterol                                                                                                                                                                                                                                                                                                                                                                    | LDL cholesterol                                                                                                                                                                                                                                                                                                                                                                                                                  | HDL cholesterol                                                                                                                                                                                                                                                                                                                                                                   | Triglycerides                                                                                                                                                                                                                                                                                                                                                                        | Significance testing                                                                                                                                                                                                                                                       |
|---------------------------------------------------------------|---------------------------------------------------------------------------------------------------------------------------------------------------------------------------------------|--------|--------------------------------------------------------------------------------------------------------------------------------------------------------------------------------------------------------------------------------------------------------------------------------------------------------------------------------------------------------------------------------------|----------------------------------------------------------------------------------------------------------------------------------------------------------------------------------------------------------------------------------------------------------------------------------------------------------------------------------------------------------------------------------------------------------------------------------|-----------------------------------------------------------------------------------------------------------------------------------------------------------------------------------------------------------------------------------------------------------------------------------------------------------------------------------------------------------------------------------|--------------------------------------------------------------------------------------------------------------------------------------------------------------------------------------------------------------------------------------------------------------------------------------------------------------------------------------------------------------------------------------|----------------------------------------------------------------------------------------------------------------------------------------------------------------------------------------------------------------------------------------------------------------------------|
| Hunninghake et al, 1990<br>Efficacy and safety of pravastatin | Pravastatin 10 mg (n=65)<br>Pravastatin 20 mg (n=56)<br>Pravastatin 40 mg (n=59)<br>Placebo (n=88)                                                                                    | mmol/L | Pravastatin 10 mg:<br>Baseline 7.86 mmol/L;<br>12 wk 6.88 mmol/L; %<br>change -12.9 mmol/L<br><br>Pravastatin 20 mg<br>Baseline 8.22 mmol/L;<br>12 wk 6.80 mmol/L; %<br>change -17.4 mmol/L<br><br>Pravastatin 40 mg:<br>Baseline 7.86 mmol/L;<br>12 wk 6.06 mmol/L; %<br>change -23.3 mmol/L<br><br>Placebo:<br>Baseline 7.94 mmol/L;<br>12 wk 8.24 mmol/L; %<br>change +3.7 mmol/L | Pravastatin 10 mg:<br>Baseline 229.1 (5.90<br>mmol/L); 12 wk 4.90<br>mmol/L; % change -17.5<br>mmol/L<br><br>Pravastatin 20 mg<br>Baseline 245.4 (6.36<br>mmol/L); 12 wk 4.94<br>mmol/L; % change -22.9<br>mmol/L<br><br>Pravastatin 40 mg:<br>Baseline 229.0 (5.90<br>mmol/L); 12 wk 4.11<br>mmol/L; % change -30.8<br>mmol/L<br><br>Placebo:<br>Baseline 232.6 (5.98<br>mmol/L); 12 wk 5.98<br>mmol/L; % change +3.3<br>mmol/L | Pravastatin 10 mg:<br>Baseline 1.22 mmol/L;<br>12 wk 1.29 mmol/L; %<br>change +5.6 mmol/L<br><br>Pravastatin 20 mg<br>Baseline 1.10 mmol/L;<br>12 wk 1.17 mmol/L; %<br>change +5.6 mmol/L<br><br>Pravastatin 40 mg:<br>Baseline 1.22 mmol/L;<br>12 wk 1.30 mmol/L; %<br>change +6.7 mmol/L<br><br>Placebo:<br>Baseline 1.18 mmol/L;<br>12 wk 1.19 mmol/L; %<br>change +1.2 mmol/L | Pravastatin 10 mg:<br>Baseline 1.41 mmol/L;<br>12 wk 1.26 mmol/L; %<br>change -11.0 mmol/L<br><br>Pravastatin 20 mg<br>Baseline 1.42 mmol/L;<br>12 wk 1.21 mmol/L; %<br>change -14.7 mmol/L<br><br>Pravastatin 40 mg:<br>Baseline 1.37 mmol/L;<br>12 wk 1.16 mmol/L; %<br>change -15.4 mmol/L<br><br>Placebo:<br>Baseline 1.50 mmol/L;<br>12 wk 1.55 mmol/L; %<br>change +3.5 mmol/L | Significant difference from baseline in LDL for all groups at all time-points (p<0.001).<br><br>Reductions in LDL & total cholesterol were significantly greater with pravastatin 20 mg than with 10 mg (p<0.01) and greater with 40 mg than with 20 mg or 10 mg (p<0.001) |
| Isaacsohn et al, 2001                                         | Cerivastatin 0.4 mg (n= 195)<br>Cerivastatin 0.8 mg (n= 776)<br>Pravastatin 40 mg: (n= 199)<br>All pravastatin patients received placebo for 8 wks & then took pravastatin for 46 wks | mg/dL  | Cerivastatin 0.4 mg:<br>Baseline 276.6<br>52 wks no data<br>Change -23.8% ± SE 0.74<br><br>Cerivastatin 0.8 mg:<br>Baseline 275.2<br>52 wks no data<br>Change -29% ± SE 0.42<br><br>Pravastatin:<br>Baseline 266<br>46 wks no data<br>Change -22.1% ± SE 0.73                                                                                                                        | Cerivastatin 0.4 mg:<br>Baseline 191.3<br>52 wks no data<br>Change -33.6 ± SE 0.98<br><br>Cerivastatin 0.8 mg:<br>Baseline 190.1<br>52 wks no data<br>Change -40.8 ± SE 0.55<br><br>Pravastatin:<br>Baseline 183.3<br>46 wks no data<br>Change -31.5% ± SE 0.96                                                                                                                                                                  | Cerivastatin 0.4 mg:<br>Baseline 48.3<br>52 wks no data<br>Change +8.0% ± SE 0.98<br><br>Cerivastatin 0.8 mg:<br>Baseline 48.8<br>52 wks no data<br>Change +9.7% ± 0.55<br><br>Pravastatin:<br>Baseline 48.3<br>46 wks no data<br>Change +7.1% ± SE 0.96                                                                                                                          | Cerivastatin 0.4 mg:<br>Baseline 185.3<br>52 wks no data<br>Change -13.8 ± 2.07<br><br>Cerivastatin 0.8 mg:<br>Baseline 183.3<br>52 wks no data<br>Change -18.3 ± SE 1.17<br><br>Pravastatin:<br>Baseline 172<br>46 wks no data<br>Change -8.9% ± SE 2.02                                                                                                                            | Cerivastatin 0.8 mg was significantly more effective than 0.4 mg or pravastatin at reducing total cholesterol, LDL (p<0.0001) and triglycerides (p<0.05). Also significantly better at increasing HDL than pravastatin (p<0.05).                                           |

| Author 2              | Treatments & daily dose (mg)                                                             | Units | Total cholesterol                                                        | LDL cholesterol                                                          | HDL cholesterol                                                            | Triglycerides                                                            | Significance testing                                                                                                                                                              |
|-----------------------|------------------------------------------------------------------------------------------|-------|--------------------------------------------------------------------------|--------------------------------------------------------------------------|----------------------------------------------------------------------------|--------------------------------------------------------------------------|-----------------------------------------------------------------------------------------------------------------------------------------------------------------------------------|
| Jacobson et al, 1995  | Pravastatin 20 mg evening (n=182)                                                        | mg/dL | Pravastatin:<br>Baseline 7.3 ± 0.1<br>12 wks 5.8 ± 0.1<br>change -20%    | Pravastatin:<br>Baseline 5.4 ± 0.1<br>12 wks 4.0 ± 0.1<br>change -26%    | Pravastatin:<br>Baseline 1.15 ± 0.02<br>12 wks 1.16 ± 0.04<br>change -0.4% | Pravastatin:<br>Baseline 1.5 ± 0.05<br>12 wks 1.4 ± 0.06<br>change -6%   | Pravastatin significantly better than placebo for total & LDL cholesterol & triglycerides, but not for HDL.                                                                       |
|                       | Placebo (n= 63)                                                                          |       | Placebo:<br>Baseline 7.3 ± 0.1<br>12 wks 7.0 ± 0.1<br>change -3.6%       | Placebo:<br>Baseline 5.5 ± 0.1<br>12 wks 5.2 ± 0.1<br>change -5.0%       | Placebo:<br>Baseline 1.2 ± 0.04<br>12 wks 1.2 ± 0.04<br>change +2.5%       | Placebo:<br>Baseline 1.48 ± 0.1<br>12 wks 1.5 ± 0.1<br>change +6%        |                                                                                                                                                                                   |
| Jacotot et al, 1995b  | Fluvastatin evening (n= 68)<br>40 mg for 4 wks then 80 mg/day (high dose given 2x daily) | mg/dL | Fluvastatin:<br>Baseline 297 ± 54<br>16 wks 232 ± 48<br>change -21% ± 13 | Fluvastatin:<br>Baseline 215 ± 53<br>16 wks 150 ± 48<br>change -30% ± 17 | Fluvastatin:<br>Baseline 52 ± 12<br>16 wks 56 ± 15<br>change +8% ± 17      | Fluvastatin:<br>Baseline 151 ± 67<br>16 wks 128 ± 81<br>change -15% ± 27 | Significant change from baseline for all lipid parameters with pravastatin & for all except HDL with fluvastatin (p<0.01).<br><br>Between group differences were not significant. |
|                       | Pravastatin evening (n= 66)<br>20 mg for 4 wks then 40 mg/day (once daily)               |       | Pravastatin:<br>Baseline 308 ± 59<br>16 wks 252 ± 54<br>change -18% ± 10 | Pravastatin:<br>Baseline 227 ± 61<br>16 wks 167 ± 55<br>change -26% ± 13 | Pravastatin:<br>Baseline 55 ± 18<br>16 wks 59 ± 18<br>change +9% ± 17      | Pravastatin:<br>Baseline 134 ± 55<br>16 wks 132 ± 83<br>change -3% ± 32  |                                                                                                                                                                                   |
| Joukhadar et al, 2001 | Atorvastatin 10 mg (n= 33)                                                               | mg/dL | Atorvastatin:<br>Baseline 6.5 ± 0.8<br>12 wks 5.0 ± 0.7<br>change -24%   | Atorvastatin:<br>Baseline 4.3 ± 0.7<br>12 wks 2.7 ± 0.6<br>change -37%   | Atorvastatin:<br>Baseline 1.6 ± 0.4<br>12 wks 1.8 ± 0.4<br>change +8%      | Atorvastatin:<br>Baseline 1.3 ± 0.4<br>12 wks 1.0 ± 0.4<br>change -19%   | Significant reductions in total cholesterol, LDL & triglycerides with all treatments (p<0.001). No significant differences between groups at p<0.05.                              |
|                       | Simvastatin 40 mg (n= 33)                                                                |       | Simvastatin:<br>Baseline 6.8 ± 0.8<br>12 wks 4.8 ± 1.0<br>change -29%    | Simvastatin:<br>Baseline 4.5 ± 0.9<br>12 wks 2.5 ± 0.9<br>change -45%    | Simvastatin:<br>Baseline 1.8 ± 0.6<br>12 wks 1.8 ± 0.6<br>change +5%       | Simvastatin:<br>Baseline 1.3 ± 0.7<br>12 wks 1.1 ± 0.6<br>change -13%    |                                                                                                                                                                                   |
|                       | Pravastatin 40 mg (n= 33)                                                                |       | Pravastatin:<br>Baseline 6.7 ± 0.7<br>12 wks 5.2 ± 0.7<br>change -22%    | Pravastatin:<br>Baseline 4.3 ± 0.8<br>12 wks 3.0 ± 0.6<br>change -31%    | Pravastatin:<br>Baseline 1.8 ± 0.5<br>12 wks 1.8 ± 0.5<br>change +1%       | Pravastatin:<br>Baseline 1.3 ± 0.8<br>12 wks 1.1 ± 0.6<br>change -16%    |                                                                                                                                                                                   |
|                       |                                                                                          |       |                                                                          |                                                                          |                                                                            |                                                                          |                                                                                                                                                                                   |

| Author 2           | Treatments & daily dose (mg)                        | Units  | Total cholesterol                                                                   | LDL cholesterol                                                                        | HDL cholesterol                                                                       | Triglycerides                                                                         | Significance testing                                                                                                                                                         |
|--------------------|-----------------------------------------------------|--------|-------------------------------------------------------------------------------------|----------------------------------------------------------------------------------------|---------------------------------------------------------------------------------------|---------------------------------------------------------------------------------------|------------------------------------------------------------------------------------------------------------------------------------------------------------------------------|
| Jukema et al, 1995 | Pravastatin 40 mg (n=450)                           | mmol/L | Pravastatin:<br>Baseline 6.02 ± 0.9<br>2 yrs 4.9 ± 1.0<br>change -1.12              | Pravastatin:<br>Baseline 4.3 ± 0.78<br>2 yrs 3.2 ± 0.9<br>change -1.1                  | Pravastatin:<br>Baseline 0.93 ± 0.23<br>2 yrs 1.01 ± 0.27<br>change +0.08             | Pravastatin:<br>Baseline 1.8 ± 0.8<br>2 yrs 1.5 ± 0.9<br>change -0.3                  | Significant change from baseline with pravastatin for total cholesterol, LDL, HDL and triglycerides at 24 mths                                                               |
|                    | Placebo (n=434)                                     |        | Placebo:<br>Baseline 6.05 ± 0.9<br>2 yrs 6.1 ± 1.0<br>change +0.05                  | Placebo:<br>Baseline 4.3 ± 0.78<br>2 yrs 4.4 ± 0.87<br>change +0.1                     | Placebo:<br>Baseline 0.93 ± 0.23<br>2 yrs 0.93 ± 0.24<br>change none                  | Placebo:<br>Baseline 1.8 ± 0.8<br>2 yrs 1.7 ± 1.0<br>change -0.1                      |                                                                                                                                                                              |
| Keech et al, 1994  | Simvastatin 20 mg (n= 208)                          | mmol/L | Simvastatin 20 mg:<br>Baseline 7.0 ± 1.3<br>3 yrs 5.3 ± 1.2<br>change -25.5% no SD  | Simvastatin 20 mg:<br>Baseline 4.85 ± 1.13<br>3 yrs 2.9 ± 1.25<br>change -40.2% no SD  | Simvastatin 20 mg:<br>Baseline 1.17 ± 0.35<br>3 yrs 1.21 ± 0.39<br>change +3.4% no SD | Simvastatin 20 mg:<br>Baseline 2.63 ± 1.84<br>3 yrs 2.15 ± 1.24<br>change 18.3% no SD | Simvastatin 40 mg & 20 mg were significantly more effective than placebo at changing total cholesterol, LDL (p<0.0001), HDL (p<0.001) and triglycerides (p<0.05) over 3 yrs. |
|                    | Simvastatin 40 mg (n= 206)                          |        | Simvastatin 40 mg:<br>Baseline 7.0 ± 1.22<br>3 yrs 5.1 ± 1.4<br>change -27.7% no SD | Simvastatin 40 mg:<br>Baseline 4.84 ± 1.04<br>3 yrs 3.15 ± 1.04<br>change -34.9% no SD | Simvastatin 40 mg:<br>Baseline 1.16 ± 0.34<br>3 yrs 1.31 ± 0.37<br>change +13% no SD  | Simvastatin 40 mg:<br>Baseline 2.47 ± 1.22<br>3 yrs 2.0 ± 1.0<br>change -19% no SD    |                                                                                                                                                                              |
|                    | Placebo (n= 207)                                    |        | Placebo:<br>Baseline 7.0 ± 1.2<br>3 yrs 6.8 ± 1.3<br>change -2.6% no SD             | Placebo:<br>Baseline 4.71 ± 1.1<br>3 yrs 4.5 ± 1.33<br>change -4.5% no SD              | Placebo:<br>Baseline 1.16 ± 0.31<br>3 yrs 1.17 ± 0.41<br>change +0.9% no SD           | Placebo:<br>Baseline 2.63 ± 1.49<br>3 yrs 2.56 ± 1.31<br>change -2.7% no SD           |                                                                                                                                                                              |
| LaRosa et al, 1994 | Lovastatin 20 mg (n= 144; M=27, F=107)              | mmol/L | Lova 20 mg: Men<br>Baseline 6.5 no SD<br>48 wks 5.39 no SD<br>Change -0.959 no SD   | Lova 20 mg: Men<br>Baseline 4.62 no SD<br>48 wks 3.49 no SD<br>Change -1.143 no SD     | Lova 20 mg: Men<br>Baseline 1.14 no SD<br>48 wks 1.22<br>Change 0.08 no SD            | Lova 20 mg: Men<br>Baseline 1.59 no SD<br>48 wks 1.50 no SD<br>Change -0.180 no SD    |                                                                                                                                                                              |
|                    | Data for men Lovastatin 40 mg (n= 145; M=34, F=111) |        | Lova 40 mg: Men<br>Baseline 6.65 no SD<br>48 wks 5.02 no SD<br>Change -1.533 no SD  | Lova 40 mg: Men<br>Baseline 4.74 no SD<br>48 wks 3.18 no SD<br>Change -1.425 no SD     | Lova 40 mg: Men<br>Baseline 1.12 no SD<br>48 wks 1.19<br>Change 0.07 no SD            | Lova 40 mg: Men<br>Baseline 1.73 no SD<br>48 wks 1.50 no SD<br>Change -0.380 no SD    |                                                                                                                                                                              |
|                    | Placebo (n= 142; M=54, F=88)                        |        | Placebo: Men<br>Baseline 6.67 no SD<br>48 wks 5.39 no SD<br>Change +0.248 no SD     | Placebo: Men<br>Baseline 4.72 no SD<br>48 wks 4.75 no SD<br>Change -0.197 no SD        | Placebo: Men<br>Baseline 1.16 no SD<br>48 wks 1.22 no SD<br>Change + 0.047            | Placebo: Men<br>Baseline 1.74 no SD<br>48 wks 1.76 no SD<br>Change 0.017 no SD        |                                                                                                                                                                              |
|                    | Once daily in evening                               |        |                                                                                     |                                                                                        |                                                                                       |                                                                                       |                                                                                                                                                                              |

| Author 2                 | Treatments & daily dose (mg)                   | Units  | Total cholesterol                                                                    | LDL cholesterol                                                                      | HDL cholesterol                                                                      | Triglycerides                                                                           | Significance testing                                                                                             |
|--------------------------|------------------------------------------------|--------|--------------------------------------------------------------------------------------|--------------------------------------------------------------------------------------|--------------------------------------------------------------------------------------|-----------------------------------------------------------------------------------------|------------------------------------------------------------------------------------------------------------------|
| LaRosa et al, 1994       | Lovastatin 20 mg (n= 144; M=27, F=107)         | mmol/L | Lova 20 mg: Women<br>Baseline 6.90 no SD<br>48 wks 5.65 no SD<br>Change -1.135 no SD | Lova 20 mg: Women<br>Baseline 4.74 no SD<br>48 wks 3.51 no SD<br>Change -1.117 no SD | Lova 20 mg: Women<br>Baseline 1.14 no SD<br>48 wks 1.19 no SD<br>Change +0.083 no SD | Lova 20 mg: Women<br>Baseline 1.66 no SD<br>48 wks 1.47 no SD<br>Change -0.114          |                                                                                                                  |
| Data for women           | Lovastatin 40 mg (n= 145; M=34, F=111)         |        | Lova 40 mg: Women<br>Baseline 6.84 no SD<br>48 wks 5.62 no SD<br>Change -1.202 no SD | Lova 40 mg: Women<br>Baseline 4.66 no SD<br>48 wks 3.52 no SD<br>Change -1.166 no SD | Lova 40 mg: Women<br>Baseline 1.12 no SD<br>48 wks 1.15 no SD<br>Change +0.072 no SD | Lova 40 mg: Women<br>Baseline 1.83 no SD<br>48 wks 1.53 no SD<br>Change -0.265 no SD    |                                                                                                                  |
|                          | Placebo (n= 142; M=54, F=88)                   |        | Placebo: Women<br>Baseline 7.00 no SD<br>48 wks 7.08 no SD<br>Change +0.08           | Placebo: Women<br>Baseline 4.72 no SD<br>48 wks 4.88 no SD<br>Change +0.153 no SD    | Placebo: Women<br>Baseline 1.39 no SD<br>48 wks 1.33 no SD<br>Change +0.021 no SD    | Placebo: Women<br>Baseline 1.87 no SD<br>48 wks 1.91 no SD<br>Change -0.142 no SD       |                                                                                                                  |
|                          | Once daily in evening                          |        |                                                                                      |                                                                                      |                                                                                      |                                                                                         |                                                                                                                  |
| Lecerf, 1993             | Simvastatin 10-40 mg daily (evening). (n=67)   | g/L    | Simvastatin:<br>Baseline: 3.24 ± 0.69; 18 wks no data; % change -26.5%               | Simvastatin:<br>Baseline: 2.41 ± 0.68; 18 wks no data; % change -35.1%               | Simvastatin:<br>Baseline: 0.5 ± 0.17; 18 wks no data; % change 12.3%                 | Median values<br>Simvastatin:<br>Baseline: 1.66 ± 0.98; 18 wks no data; % change -21.9% | Significantly greater reduction in LDL cholesterol after 18 wks with simvastatin than with gemfibrozil (p<0.01). |
|                          | Gemfibrozil 900 mg once daily (evening) (n=69) |        | Gemfibrozil:<br>Baseline: 3.21 ± 0.72; 18 wks no data; % change -12.2%               | Gemfibrozil:<br>Baseline: 2.33 ± 0.68; 18 wks no data; % change -13.0%               | Gemfibrozil:<br>Baseline: 0.52 ± 0.17; 18 wks no data; % change 12.6%                | Gemfibrozil:<br>Baseline: 1.68 ± 0.88; 18 wks no data; % change -42.9%                  | Significant reduction in triglycerides, total & LDL cholesterol (p<0.01) at 6, 12 & 18 wks with simvastatin      |
| Leichleitner et al, 1995 | Simvastatin 10/20 mg daily (n= 32)             | mg/dL  | Simvastatin:<br>Baseline 330.4<br>12 wks no data<br>Change -23.9% ± 15.9             | Simvastatin:<br>Baseline 249.7<br>12 wks no data<br>Change -35/9% ± 17.4             | Simvastatin:<br>Baseline 48.9<br>12 wks no data<br>Change +19.5% ± 54.3              | Simvastatin:<br>Baseline 198.4<br>12 wks no data<br>Change -7.9% ± 45                   | Simvastatin significantly more effective than bezafibrate at reducing total cholesterol & LDL (p<0.01).          |
|                          | Bezafibrate 600 mg/day (n= 31)                 |        | Bezafibrate:<br>Baseline 331.2<br>12 wks no data<br>Change -13.5% ± 12.4             | Bezafibrate:<br>Baseline 244.6<br>12 wks no data<br>Change -17.2% ± 17.0             | Bezafibrate:<br>Baseline 48.7<br>12 wks no data<br>Change +17.8% ± 31.5              | Bezafibrate:<br>Baseline 189.3<br>12 wks no data<br>Change -21.3% ± 31.5                |                                                                                                                  |

| Author 2           | Treatments & daily dose (mg)                                                                                                                                                                                                                                                                                 | Units  | Total cholesterol                                                                                                                                          | LDL cholesterol                                                                                                                                             | HDL cholesterol                                                                                                                                            | Triglycerides                                                                                                                                                     | Significance testing                                                                                                                                                       |
|--------------------|--------------------------------------------------------------------------------------------------------------------------------------------------------------------------------------------------------------------------------------------------------------------------------------------------------------|--------|------------------------------------------------------------------------------------------------------------------------------------------------------------|-------------------------------------------------------------------------------------------------------------------------------------------------------------|------------------------------------------------------------------------------------------------------------------------------------------------------------|-------------------------------------------------------------------------------------------------------------------------------------------------------------------|----------------------------------------------------------------------------------------------------------------------------------------------------------------------------|
| Leiter et al, 1999 | Cerivastatin 0.05-0.3 mg/day (n= 260)<br><br>Simvastatin 5-40 mg/day (n= 127)<br><br>Once daily<br>Lowest dose for 8 wks, then titrated up at 0.1 mg/day or 10 mg/day if LDL >3.36 mmol/L.<br>Further titration at wks 16 & 24 if needed.<br>Mean dose at end-point:<br>Ceriv0.24 mg/day<br>Simv 21.7 mg/day | mmol/L | Cerivastatin:<br>Baseline 8.1 ± 1.7<br>32 wks no data<br>change -16 no SD<br><br>Simvastatin:<br>Baseline 7.9 ± 1.5<br>32 wks no data<br>change -23% no SD | Cerivastatin:<br>Baseline 6.0 ± 1.7<br>32 wks no data<br>change -23% no SD<br><br>Simvastatin:<br>Baseline 5.7 ± 1.5<br>32 wks no data<br>change -32% no SD | Cerivastatin:<br>Baseline 1.2 ± 0.3<br>32 wks no data<br>change +9% no SD<br><br>Simvastatin:<br>Baseline 1.3 ± 0.3<br>32 wks no data<br>change +11% no SD | Cerivastatin:<br>Baseline 2.0 ± 0.7<br>32 wks no data<br>change -9% no Sd<br><br>Simvastatin:<br>Baseline 1.2 ± 0.8<br>32 wks no data<br>change -10% no SD        | Significantly greater reduction in LDL & total cholesterol with simvastatin than with cerivastatin (p<0.05)                                                                |
| Lijnen et al, 1996 | Pravastatin (n= )<br><br>Placebo (n= )<br><br>Once daily, evening<br><br>Dose titrated from 10 mg to 20 mg to 40 mg at 4 wk intervals.<br>Only 1 pt did not titrate up from 20 mg                                                                                                                            | mmol/L | Pravastatin:<br>Baseline 7.2 no SD<br>6 mths 5.4 no SD<br>change no data<br><br>Placebo:<br>Baseline 7.4 no SD<br>6 mths 7.5 no SD<br>change no data       | Pravastatin:<br>Baseline 3.4 no SD<br>6 mths 2.3 no SD<br>change no data<br><br>Placebo:<br>Baseline 3.3 no SD<br>6 mths 3.5 no SD<br>change no data        | Pravastatin:<br>Baseline 1.25 no SD<br>6 mths 1.3 no SD<br>change no data<br><br>Placebo:<br>Baseline 1.3 no SD<br>6 mths 1.3 no SD<br>change no data      | Pravastatin: <b>mg/dL</b><br>Baseline 168 no SD<br>6 mths 160 no SD<br>change no data<br><br>Placebo:<br>Baseline 170 no SD<br>6 mths 168 no SD<br>change no data | Pravastatin significantly better than placebo at reducing total cholesterol & LDL (p<0.001).<br><br>No significant difference between treatments for HDL or triglycerides. |

| Author 2                                         | Treatments & daily dose (mg)                                  | Units  | Total cholesterol                                                                                                                                                                   | LDL cholesterol                                                                      | HDL cholesterol                                                                      | Triglycerides                                                                        | Significance testing                                                                                                                               |
|--------------------------------------------------|---------------------------------------------------------------|--------|-------------------------------------------------------------------------------------------------------------------------------------------------------------------------------------|--------------------------------------------------------------------------------------|--------------------------------------------------------------------------------------|--------------------------------------------------------------------------------------|----------------------------------------------------------------------------------------------------------------------------------------------------|
| Lintott et al, 1993                              | Simvastatin(n= 24)                                            | mmol/L | Simvastatin:<br>Baseline 8.6 ± 0.3<br>18 wks 5.8 ± 0.2<br>change (absolute) -2.8                                                                                                    | Simvastatin:<br>Baseline 6.5 ± 0.3<br>18 wks 4.1 ± 0.2<br>change (absolute) -2.5     | Simvastatin:<br>Baseline 1.1 ± 0.1<br>18 wks 1.2 ± 0.1<br>change (absolute) +0.1     | Simvastatin:<br>Baseline 1.7 ± 0.2<br>18 wks 1.5 ± 0.2<br>change (absolute) -0.2     | Significant change from baseline to 18 wks for both statins for total cholesterol, LDL & HDL but not triglycerides (p<0.01)                        |
|                                                  | Pravastatin (n= 24)                                           |        | Dose titration up from 10 mg to 40 mg daily<br>Dose /day by wk 18:<br>Sim 10 mg 3/24<br>Sim 20 mg 3/24<br>Sim 40 mg 18/24<br>Prav 10 mg 1/24<br>Prav 20 mg 0/24<br>Prav 40 mg 22/24 | Pravastatin:<br>Baseline 8.4 ± 0.3<br>18 wks 6.7 ± 0.2<br>change (absolute) -1.7     | Pravastatin:<br>Baseline 6.3 ± 0.3<br>18 wks 4.6 ± 0.2<br>change (absolute) -1.7     | Pravastatin:<br>Baseline 1.1 ± 0.1<br>18 wks 1.2 ± 0.1<br>change (absolute) +0.1     |                                                                                                                                                    |
| Lovastatin<br>Pravastatin<br>Study Group<br>1990 | Lovastatin (n= 339)                                           | mg/dL  | Lovastatin:<br>Baseline 287 ± 45<br>18 wks no data<br>change -18% ± 13                                                                                                              | Lovastatin:<br>Baseline 194 ± 48<br>18 wks no data<br>change -39% ± 18               | Lovastatin:<br>Baseline 51 ± 16<br>18 wks no data<br>change +19% ± 41                | Lovastatin:<br>Baseline 145 ± 80<br>18 wks no data<br>change -22% ± 35               |                                                                                                                                                    |
|                                                  | 20 mg/day for 6 wks, then 40 mg for 6 wks & 80 for last 6 wks |        | Pravastatin:<br>Baseline 288 ± 47<br>18 wks no data<br>change -19% ± 12                                                                                                             | Pravastatin:<br>Baseline 196 ± 49<br>18 wks no data<br>change -27% ± 16              | Pravastatin:<br>Baseline 49 ± 16<br>18 wks no data<br>change +16% ± 37               | Pravastatin:<br>Baseline 140 ± 206<br>18 wks no data<br>change -15% ± 34             |                                                                                                                                                    |
|                                                  | Pravastatin (n=333)                                           |        | 10 mg/day for 6 wks, then 20 mg for 6 wks & 40 for last 6 wks                                                                                                                       |                                                                                      |                                                                                      |                                                                                      |                                                                                                                                                    |
| Lye et al, 1998                                  | Fluvastatin 40 mg once daily (n= 33)                          | mmol/L | Fluvastatin:<br>Baseline 7.4 ± 0.9<br>12 wks no data<br>change (absolute) -1.6 ± 0.7                                                                                                | Fluvastatin:<br>Baseline 5.2 ± 0.7<br>12 wks no data<br>change (absolute) -1.4 ± 0.5 | Fluvastatin:<br>Baseline 1.4 ± 0.3<br>12 wks no data<br>change (absolute) +0.1 ± 0.2 | Fluvastatin:<br>Baseline 1.6 ± 0.6<br>12 wks no data<br>change (absolute) -0.3 ± 0.3 | Significant change from baseline to 12 wks with fluvastatin for all lipid parameters (p<0.05). Significantly more effective than placebo (p=0.05). |
|                                                  | Placebo (n= 36)                                               |        | Placebo:<br>Baseline 7.5 ± 0.8<br>12 wks no data<br>change (absolute) -0.2 ± 0.6                                                                                                    | Placebo:<br>Baseline 5.3 ± 0.6<br>12 wks no data<br>change (absolute) -0.1 ± 0.5     | Placebo:<br>Baseline 1.3 ± 0.3<br>12 wks no data<br>change (absolute) -0.0 ± 0.1     | Placebo:<br>Baseline 2.0 ± 0.8<br>12 wks no data<br>change (absolute) -0.1 ± 0.5     |                                                                                                                                                    |

| Author 2                 | Treatments & daily dose (mg)                      | Units  | Total cholesterol                                                               | LDL cholesterol                                                                 | HDL cholesterol                                                                 | Triglycerides                                                                   | Significance testing                                                                                                                                         |
|--------------------------|---------------------------------------------------|--------|---------------------------------------------------------------------------------|---------------------------------------------------------------------------------|---------------------------------------------------------------------------------|---------------------------------------------------------------------------------|--------------------------------------------------------------------------------------------------------------------------------------------------------------|
| MAAS investigators, 1994 | Simvastatin 20 mg (n= 193)                        | mmol/L | Simvastatin:<br>Baseline 6.4 ± 0.7<br>4 yrs 5.0 ± 0.8<br>change no data         | Simvastatin:<br>Baseline 4.4 ± 0.7<br>4 yrs 3.0 ± 0.7<br>change no data         | Simvastatin:<br>Baseline 1.1 ± 0.3<br>4 yrs 1.2 ± 0.3<br>change no data         | Simvastatin:<br>Baseline 1.9 ± 1.0<br>4 yrs 1.7 ± 0.8<br>change                 |                                                                                                                                                              |
|                          | Placebo (n= 188)                                  |        | Once daily evening                                                              | Placebo:<br>Baseline 6.4 ± 0.8<br>4 yrs 6.4 ± 0.7<br>change no data             | Placebo:<br>Baseline 4.5 ± 0.8<br>4 yrs 4.4 ± 0.7<br>change no data             | Placebo:<br>Baseline 1.1 ± 0.3<br>4 yrs 1.1 ± 0.3<br>change no data             |                                                                                                                                                              |
| MacMahon et al, 1998     | Pravastatin 40 mg/day                             | mmol/L | Pravastatin:<br>Baseline 5.6 ± SE 0.05<br>3 yrs 4.5 ± SE 0.06<br>change no data | Pravastatin:<br>Baseline 3.9 ± SE 0.04<br>3 yrs 2.8 ± SE 0.05<br>change no data | Pravastatin:<br>Baseline 1.0 ± SE 0.01<br>3 yrs 0.1 ± SE 0.02<br>change no data | Pravastatin:<br>Baseline 1.8 ± SE 0.06<br>3 yrs 1.6 ± SE 0.06<br>change no data | Pravastatin significantly more effective than placebo at changing total cholesterol, LDL (p<0.0001), HDL (p<0.001), & triglycerides (p<0.002) at yr 1 & yr 3 |
|                          | Placebo (n= not stated, assumed equal split; 261) |        | Once daily evening                                                              | Placebo:<br>Baseline 5.7 ± SE 0.05<br>3 yrs 5.6 ± SE 0.05<br>change no data     | Placebo:<br>Baseline 3.9 ± SE 0.05<br>3 yrs 3.8 ± SE 0.05<br>change no data     | Placebo:<br>Baseline 0.9 ± SE 0.01<br>3 yrs 0.9 ± SE 0.02<br>change no data     |                                                                                                                                                              |
| Maggi et al, 1994        | Simvastatin 20 mg/day (n =20)                     | mg/dL  | Simvastatin:<br>Baseline 264 ± 31<br>6 mths 212 ± 24<br>change no data          | Simvastatin:<br>Baseline 193 ± 34<br>6 mths 139 ± 30<br>change no data          | Simvastatin:<br>Baseline 52 ± 11<br>6 mths 54 ± 13<br>change no data            | Simvastatin:<br>Baseline 142 ± 79<br>6 mths 145 ± 90<br>change no data          | Simvastatin & bezfibrate significantly more effective than placebo for total cholesterol & LDL(p<0.01).                                                      |
|                          | Placebo (n =20)                                   |        | Bezfibrate:<br>Baseline 260 ± 33<br>6 mths 220 ± 19<br>change no data           | Bezfibrate:<br>Baseline 184 ± 30<br>6 mths 147 ± 20<br>change no data           | Bezfibrate:<br>Baseline 57 ± 12<br>6 mths 64 ± 12<br>change no data             | Bezfibrate:<br>Baseline 124 ± 79<br>6 mths 84 ± 38<br>change no data            |                                                                                                                                                              |
|                          | Bezfibrate 400 mg (n=21)                          |        | Placebo:<br>Baseline 266 ± 29<br>6 mths 262 ± 26<br>change no data              | Placebo:<br>Baseline 198 ± 25<br>6 mths 191 ± 28<br>change no data              | Placebo:<br>Baseline 49 ± 8<br>6 mths 49 ± 10<br>change no data                 | Placebo:<br>Baseline 121 ± 45<br>6 mths 148 ± 75<br>change no data              | Bezfibrate also significantly more effective than placebo at changing triglycerides & HDL (p<0.01).                                                          |

| Author 2            | Treatments & daily dose (mg)                                                                                                                                                                           | Units  | Total cholesterol                                                            | LDL cholesterol                                                                | HDL cholesterol                                                                  | Triglycerides                                                             | Significance testing                                                                                      |
|---------------------|--------------------------------------------------------------------------------------------------------------------------------------------------------------------------------------------------------|--------|------------------------------------------------------------------------------|--------------------------------------------------------------------------------|----------------------------------------------------------------------------------|---------------------------------------------------------------------------|-----------------------------------------------------------------------------------------------------------|
| Mercuri et al, 1996 | Pravastatin 40 mg once daily (n= 151)                                                                                                                                                                  | mmol/L | Pravastatin:<br>Baseline 6.7 ± SD 0.6<br>3 yrs no data<br>change -1.0± SE0.1 | Pravastatin:<br>Baseline 4.7 ± SD 0.5<br>3 yrs no data<br>change -1.0 ± SE 0.1 | Pravastatin:<br>Baseline 1.35 ± SD 0.3<br>3 yrs no data<br>change +0.1 ± SE 0.02 | Pravastatin:<br>Baseline 1.6 ± SD 0.5<br>3 yrs no data<br>change 0 ± SE 0 |                                                                                                           |
|                     | Placebo (n= 154)                                                                                                                                                                                       |        | Placebo:<br>Baseline 6.8 ± 0.6<br>3 yrs no data<br>change +0.2 ± SE 0.1      | Placebo:<br>Baseline 4.7 ± 0.5<br>3 yrs no data<br>change +0.1 ± SE 0.1        | Placebo:<br>Baseline 1.38 ± SD 0.3<br>3 yrs no data<br>change 0 ± SE 0.02        | Placebo:<br>Baseline 1.6 ± 0.6<br>3 yrs no data<br>change 0 ± SE 0        |                                                                                                           |
| Morgan et al, 1990  | Simvastatin 10-40 mg (n=25)                                                                                                                                                                            | mmol/L | Simvastatin:<br>Baseline 7.1 no SD; 18 wks 4.7 no SD                         | Simvastatin:<br>Baseline 4.7 no SD; 18 wks 2.5 no SD                           | Simvastatin:<br>Baseline 1.11 no SD; 18 wks 1.18 no SD                           | Simvastatin:<br>Baseline 2.7 no SD; 18 wks 2.2 no SD                      | Significant reduction in total cholesterol (p<0.01) and triglycerides. Significant increase in HDL(<0.01) |
|                     | Placebo (n=25)<br><br>Initial 10 mg/day dose given once in evening for 6 wks. Doubled at 6 & 10 wks if total cholesterol >4.5 mmol/L<br><br>Dose increases:<br>10 mg 3/24<br>20 mg 6/24<br>40 mg 15/24 |        | Placebo:<br>Baseline 7.2 no SD; 18 wks 6.7 no SD                             | Placebo:<br>Baseline 4.6 no SD; 18 wks 4.1 no SD                               | Placebo:<br>Baseline 1.0 no SD; 18 wks 1.06 no SD                                | Placebo:<br>Baseline 3.2 no SD; 18 wks 3.3 no SD                          |                                                                                                           |



| Author 2                                           | Treatments & daily dose (mg)                                   | Units  | Total cholesterol                                                                               | LDL cholesterol                                                                                 | HDL cholesterol                                                                                | Triglycerides                                                                                    | Significance testing |
|----------------------------------------------------|----------------------------------------------------------------|--------|-------------------------------------------------------------------------------------------------|-------------------------------------------------------------------------------------------------|------------------------------------------------------------------------------------------------|--------------------------------------------------------------------------------------------------|----------------------|
| Morris et al, 1996                                 | Pravastatin (n= 45)                                            | mmol/L | Pravastatin:<br>Baseline 5.9 (95% CI 5.6 - 6.2)                                                 | Pravastatin:<br>Baseline 3.9 (95% CI 3.7 - 4.2)                                                 | Pravastatin:<br>Baseline 1.7 (95% CI 1.4 - 2.1)                                                | Pravastatin:<br>Baseline 1.1 (95% CI 1.0 - 1.2)                                                  |                      |
|                                                    | Placebo (n= 53)                                                |        | 26 wks 5.5 (95% CI 5.2 - 5.8)<br>change no data                                                 | 26 wks 3.5 6.1 (95% CI 3.2 - 3.8)<br>change no data                                             | 26 wks 1.7 (95% CI 1.5 - 2.0)<br>change no data                                                | 26 wks 1.2 (95% CI 1.1 - 1.2)<br>change no data                                                  |                      |
|                                                    |                                                                |        | Placebo:<br>Baseline 6.1 (95%CI 6.0 - 6.4)<br>26 wks 6.1 ± (95%CI 5.9 - 6.4)<br>change no data  | Placebo:<br>Baseline 4.2 (95% CI 4.0 - 4.5)<br>26 wks 4.2 (95% CI 3.9 - 4.4)<br>change no data  | Placebo:<br>Baseline 1.8 (95% CI 1.5 - 2.2)<br>26 wks 1.7 (95% CI 1.5 - 2.0)<br>change no data | Placebo:<br>Baseline 1.1 (95% CI 1.0 - 1.2)<br>26 wks 1.1 (95% CI 1.0 - 1.2)<br>change no data   |                      |
| MRC/BHF Heart Protection Study Collaborative Group | Simvastatin 40 mg (n=10269)                                    | mmol/L | Simvastatin:<br>Baseline 5.8 no SD<br>36 mths 4.3 no SD<br>change -1.5 (-26%)                   | Simvastatin:<br>Baseline 3.3 no SD<br>36 mths 2.2 no SD<br>change -1.1 (-33%)                   | Simvastatin:<br>Baseline 1.05 no SD<br>36 mths 1.09 no SD<br>change +0.04 (4%)                 | Simvastatin:<br>Baseline 2.2 no SD<br>36 mths 1.8 no SD<br>change -0.4 (-18%)                    | Not stated           |
|                                                    | Placebo (n=10267)                                              |        | Once daily evening                                                                              | Placebo:<br>Baseline 5.8 no SD<br>36 mths 5.8 no SD<br>change none                              | Placebo:<br>Baseline 3.4 no SD<br>36 mths 3.4 no SD<br>change none                             | Placebo:<br>Baseline 1.05 no SD<br>36 mths 1.1 no SD<br>change +0.05                             |                      |
| Olson et al, 2001                                  | Fluvastatin 40 mg once daily (Immediate release; IR) (n= 174)  | mg/dL  | Fluvastatin IR 40 mg once daily:<br>Baseline 289 ± 44<br>24 wks no data<br>change -17% ± SE 0.9 | Fluvastatin IR 40 mg once daily:<br>Baseline 203 ± 43<br>24 wks no data<br>change -24% ± SE 1.2 | Fluvastatin IR 40 mg once daily:<br>Baseline 55 ± 12<br>24 wks no data<br>change +7% ± SE 1.3  | Fluvastatin IR 40 mg once daily:<br>Baseline 158 ± 57<br>24 wks no data<br>change -7% ± SE 2.5   |                      |
|                                                    | Fluvastatin 40 mg twice daily (Immediate release; IR) (n=175 ) |        | Fluvastatin IR 40 mg twice daily:<br>Baseline 284 ± 38<br>24 wks no data<br>change -24% ± 0.9   | Fluvastatin IR 40 mg twice daily:<br>Baseline 199 ± 36<br>24 wks no data<br>change -34 ± SE 1.2 | Fluvastatin IR 40 mg twice daily:<br>Baseline 52 ± 11<br>24 wks no data<br>change +8% ± SE 1.3 | Fluvastatin IR 40 mg twice daily:<br>Baseline 165 ± 68<br>24 wks no data<br>change -14% ± SE 2.5 |                      |

| Author 2                     | Treatments & daily dose (mg) | Units                                                 | Total cholesterol                                      | LDL cholesterol                                        | HDL cholesterol                                       | Triglycerides                                                                                         | Significance testing                                                                                    |
|------------------------------|------------------------------|-------------------------------------------------------|--------------------------------------------------------|--------------------------------------------------------|-------------------------------------------------------|-------------------------------------------------------------------------------------------------------|---------------------------------------------------------------------------------------------------------|
| Olson et al. 2001 (Abstract) | Rosuvastatin 5 mg (n=138)    | mmol/L                                                | Atorvastatin 10 mg: Baseline 7.08; 12 / 52 wks no data | Atorvastatin 10 mg: Baseline 4.86 12 /52 wks no data   | Atorvastatin 10 mg: Baseline 1.39 12 / 52 wks no data | Atorvastatin 10 mg: Baseline 1.81 12 / 52 wks no data                                                 | Atorvastatin 10 mg: (number = population) High risk 105, 50.5% Other 34, 70.6%                          |
|                              | Rosuvastatin 10 mg (n=134)   |                                                       | % change (SE) 12 wks - 28.1 (0.9)                      | % change (SE) 12 wks - 39.5 (1.2); 52 wks -44.3% (1.1) | % change (SE) 12 wks 6.2 (1.2); 52 wks -0.6% (1.3)    | % change (SE) -16.2 (2.4); 52 wks -18.7% (2.4)                                                        | All patients 139, 55.4%                                                                                 |
|                              | Atorvastatin 10 mg (n=140)   |                                                       | Rosuvastatin 5 mg: Baseline 7.07 12 / 52 wks no data   | Rosuvastatin 5 mg: Baseline 4.86 12 /52 wks no data    | Rosuvastatin 5 mg: Baseline 1.41 12 / 52 wks no data  | Rosuvastatin 5 mg: Baseline 1.76 12 / 52 wks no data                                                  | Rosuvastatin 5 mg: High risk 107, 71.0% Other 28, 89.3%                                                 |
|                              |                              |                                                       | % change (SE) 12 wks - 31.9 (1.0)                      | % change (SE) 12 wks - 45.6 (1.3); 52 wks -47.6% (1.2) | % change (SE) 12 wks 6.2 (1.3); 52 wks 1.9% (1.3)     | % change (SE) -15.1 (2.5); 52 wks -9.6% (2.4)                                                         | All patients 135, 74.8%                                                                                 |
|                              |                              | Rosuvastatin 10 mg: Baseline 7.00 12 / 52 wks no data | Rosuvastatin 10 mg: Baseline 4.86 12 /52 wks no data   | Rosuvastatin 10 mg: Baseline 1.44 12 / 52 wks no data  | Rosuvastatin 10 mg: Baseline 1.65 12 / 52 wks no data | Rosuvastatin 10 mg: High risk 92, 85.9% Other 40, 87.5%                                               |                                                                                                         |
|                              |                              | % change (SE) 12 wks - 35.3 (1.0)                     | % change (SE) 12 wks - 50.1 (1.3); 52 wks -53.2% (1.2) | % change (SE) 12 wks 8.0 (1.3); 52 wks (3.5% (1.4)     | % change (SE) -19.1 (2.5); 52 wks -21.4% (2.6)        | All patients 132, 86.4%                                                                               |                                                                                                         |
| Ose et al, 1999              | Cerivastatin 0.2 mg (n=162 ) | mg/dL                                                 | Cerivastatin 0.2 mg: Baseline 264 ± 2.9 (6.82 ± 0.07)  | Cerivastatin 0.2 mg: Baseline 181 ± 2.5 ( 4.7 ±0.06)   | Cerivastatin 0.2 mg: Baseline 52.7 ± 1.2 (1.4 ± 0.03) | Cerivastatin 0.2 mg: Baseline 152 ± 4.9 (1.7 ± 0.06)                                                  | There was no significant difference between doses of cerivastatin for triglycerides or HDL cholesterol. |
|                              | Cerivastatin 0.4 mg (n=332 ) |                                                       | 24 wks no data change -20.6% ± 0.7                     | 24 wks no data change -30.3% ± 1.0                     | 24 wks no data change +7.4% ± 1.1                     | 24 wks no data change -11.5% ± 2.2                                                                    |                                                                                                         |
|                              | Given once daily (bed time)  |                                                       | Cerivastatin 0.4 mg: Baseline 264 ± 2.1 (6.84 ± 0.05)  | Cerivastatin 0.4 mg: Baseline 180 ± 1.8 (4.7 ± 0.05)   | Cerivastatin 0.4 mg: Baseline 53.2 ± 0.9 (1.4 ± 0.02) | Cerivastatin 0.4 mg: Baseline 151 ± 3.6 (1.7 ± 0.04)                                                  |                                                                                                         |
|                              |                              | 24 wks no data change -25.6% ± 0.5                    | 24 wks no data change -37.9% ± 0.7                     | 24 wks no data change +8.4% ± 0.8                      | 24 wks no data change -11.1% ± 1.6                    | Cerivastatin 0.4 mg was significantly more effective than 0.2 mg at changing total & LDL cholesterol. |                                                                                                         |

| Author 2             | Treatments & daily dose (mg)                               | Units                                                      | Total cholesterol                                                              | LDL cholesterol                                                                          | HDL cholesterol                                                                           | Triglycerides                                                                            | Significance testing                                                                                                                    |                   |
|----------------------|------------------------------------------------------------|------------------------------------------------------------|--------------------------------------------------------------------------------|------------------------------------------------------------------------------------------|-------------------------------------------------------------------------------------------|------------------------------------------------------------------------------------------|-----------------------------------------------------------------------------------------------------------------------------------------|-------------------|
| Ose et al, 2000      | Simvastatin 40 mg (n= 436)                                 | mmol/L                                                     | Simvastatin 40 mg:<br>Baseline 8.1 ± 1.6<br>24 wks 5.6 ± 1.2<br>change no data | Simvastatin 40 mg:<br>Baseline 5.9 ± 1.6<br>24 wks 3.5 ± 1.1<br>change -41% (-42 to -39) | Simvastatin 40 mg:<br>Baseline 1.3 ± 0.3<br>24 wks 1.4 ± 0.3<br>change +8.5% (7.2 to 9.8) | Simvastatin 40 mg:<br>Baseline 1.8 ± 0.9<br>24 wks 1.4 ± 0.8<br>change -18% (-21 to -15) | Simvastatin 40 mg was significantly more effective than 80 mg at changing total cholesterol, LDL and triglycerides but not HDL.         |                   |
|                      | Simvastatin 80 mg (n= 669)                                 |                                                            | Simvastatin 80 mg:<br>Baseline 7.9 ± 1.5<br>24 wks 5.1 ± 1.1<br>change no data | Simvastatin 80 mg:<br>Baseline 5.8 ± 1.5<br>24 wks 3.1 ± 1.1<br>change -47% (-48 to -46) | Simvastatin 80 mg:<br>Baseline 1.3 ± 0.3<br>24 wks 1.3 ± 0.3<br>change +8.1% (7.1 to 9.0) | Simvastatin 80 mg:<br>Baseline 1.8 ± 1.0<br>24 wks 1.3 ± 0.6<br>change -24% (-26 to -23) |                                                                                                                                         |                   |
| Paoletti et al, 2001 | Rosuvastatin 5 mg (n=120)                                  | mmol/L                                                     | Rosuvastatin 5 mg:<br>Baseline 7.1 ± 0.6<br>12 wks no data                     | Rosuvastatin 5 mg:<br>Baseline 4.9 ± 0.5<br>12 wks no data                               | Rosuvastatin 5 mg:<br>Baseline 1.3 ± 0.3<br>12 wks no data                                | Rosuvastatin 5 mg:<br>Baseline 1.9 ± 0.7<br>12 wks no data                               | Rosuvastatin 5 mg significantly more effective than pravastatin (p<0.001) or simvastatin (p<0.005) at reducing total cholesterol & LDL. |                   |
|                      | Rosuvastatin 10 mg (n= 115)                                |                                                            | change -30% ± 0.9                                                              | change -42% ± 1.3                                                                        | change +6.0% ± 1.2                                                                        | change -12% ± 2.9                                                                        |                                                                                                                                         |                   |
|                      | Pravastatin 20 mg (n= 137)                                 |                                                            | Rosuvastatin 10 mg:<br>Baseline 7.0 ± 0.6<br>12 wks no data                    | Rosuvastatin 10 mg:<br>Baseline 4.8 ± 0.5<br>12 wks no data                              | Rosuvastatin 10 mg:<br>Baseline 1.4 ± 0.3<br>12 wks no data                               | Rosuvastatin 10 mg:<br>Baseline 1.8 ± 0.7<br>12 wks no data                              | Rosuvastatin 10 mg significantly more effective than pravastatin or simvastatin at reducing total cholesterol & LDL (p<0.001).          |                   |
|                      | Simvastatin 20 mg (n= 120)                                 |                                                            | change -34% ± 1.0                                                              | change -49% ± 1.3                                                                        | change +7.0% ± 1.3                                                                        | change -18% ± 3.0                                                                        |                                                                                                                                         |                   |
|                      | Pravastatin 20 mg:<br>Baseline 7.1 ± 0.6<br>12 wks no data | Pravastatin 20 mg:<br>Baseline 4.9 ± 0.5<br>12 wks no data | Pravastatin 20 mg:<br>Baseline 1.4 ± 0.3<br>12 wks no data                     | Pravastatin 20 mg:<br>Baseline 1.8 ± 0.7<br>12 wks no data                               | change -20% ± 0.9                                                                         | change -28% ± 1.2                                                                        | change +4.0% ± 1.2                                                                                                                      | change -13% ± 2.7 |
|                      | Simvastatin 20 mg:<br>Baseline 7.1 ± 0.7<br>12 wks no data | Simvastatin 20 mg:<br>Baseline 4.9 ± 0.6<br>12 wks no data | Simvastatin 20 mg:<br>Baseline 1.4 ± 0.3<br>12 wks no data                     | Simvastatin 20 mg:<br>Baseline 1.8 ± 0.7<br>12 wks no data                               | change -26% ± 0.9                                                                         | change -35% ± 1.2                                                                        | change +4.0% ± 1.2                                                                                                                      | change -14% ± 2.8 |

| Author 2              | Treatments & daily dose (mg)                                                                                             | Units          | Total cholesterol                                                                       | LDL cholesterol                                                                         | HDL cholesterol                                                                       | Triglycerides                                                                         | Significance testing                                                                               |
|-----------------------|--------------------------------------------------------------------------------------------------------------------------|----------------|-----------------------------------------------------------------------------------------|-----------------------------------------------------------------------------------------|---------------------------------------------------------------------------------------|---------------------------------------------------------------------------------------|----------------------------------------------------------------------------------------------------|
| Pauciullo et al, 2000 | Fluvastatin 40 mg (n= 80)<br>Evening                                                                                     | mg/dL          | Fluvastatin:<br>Baseline 282 ± 39<br>24 wks no data<br>change -17% (95% CI -20 to -15)  | Fluvastatin:<br>Baseline 189 ± 35<br>24 wks no data<br>change -23% (95% CI -26 to -18)  | Fluvastatin:<br>Baseline 40 ± 8<br>24 wks no data<br>change 0.3% (95% CI -3.8 to 4.5) | Fluvastatin:<br>Baseline 263 ± 64<br>24 wks no data<br>change -6% (95% CI-14 to 2.3)  | Fluvastatin was significantly better at changing LDL & total cholesterol than bezfibrate (p<0.001) |
|                       | Bezafibrate 400 mg (n= 86)<br>Given twice daily                                                                          |                | Bezafibrate:<br>Baseline 274 ± 36<br>24 wks no data<br>change -10% (95% CI -12 to -7.2) | Bezafibrate:<br>Baseline 179 ± 32<br>24 wks no data<br>change -10% (95% CI -13 to -6.2) | Bezafibrate:<br>Baseline 43 ± 10<br>24 wks no data<br>change 17% (95% CI13 to 21)     | Bezafibrate:<br>Baseline 257 ± 65<br>24 wks no data<br>change -25% (95% CI-33 to -17) |                                                                                                    |
| Pedersen, 1998        | Simvastatin 20 mg/day (n=2221)                                                                                           | mmol/L         | Simvastatin:<br>Baseline 6.5 ± 0.7<br>6 wk 4.5<br>% change -25%                         | Simvastatin:<br>Baseline 4.9 ± 0.7<br>6 wk no data<br>% change -35%                     | Simvastatin:<br>Baseline 1.2 ± 0.3<br>6 wk no data<br>% change +8%                    | Simvastatin:<br>Baseline 1.5 ± 0.5<br>6 wk no data<br>% change -10%                   |                                                                                                    |
|                       | Placebo (n=2223)                                                                                                         |                | Placebo:<br>Baseline 6.8 ± 0.7<br>6 wk no data<br>% change +1%                          | Placebo:<br>Baseline 4.9 ± 0.7<br>6 wk no data<br>% change +1%                          | Placebo:<br>Baseline 1.2 ± 0.3<br>6 wk no data<br>% change +1%                        | Placebo:<br>Baseline 1.5 ± 0.5<br>6 wk no data<br>% change +7%                        |                                                                                                    |
|                       | Titration to 40 mg at 12 or 24 wk in patients who did not reach target total cholesterol of 3.0-5.2 mmol/L after 6-12 wk |                |                                                                                         |                                                                                         |                                                                                       |                                                                                       |                                                                                                    |
|                       | Daily dose taken:<br>10 mg 2 pts (0.1%)<br>20 mg 62.9%<br>40 mg 37%                                                      |                |                                                                                         |                                                                                         |                                                                                       |                                                                                       |                                                                                                    |
| Pitt et al, 1993      | Pravastatin 40 mg (n=206 )                                                                                               | mmol/L / mg/dL | Pravastatin:<br>Baseline 5.97 no SD<br>3 yrs no data<br>change -19%                     | Pravastatin:<br>Baseline 4.24 no SD<br>3 yrs no data<br>change -28%                     | Pravastatin:<br>Baseline 1.06 no SD<br>3 yrs no data<br>change +7%                    | Pravastatin:<br>Baseline 1.87 no SD<br>3 yrs no data<br>change -8%                    | Pravastatin was significantly more effective than placebo at changing all parameters (p<0.001)     |
|                       | Placebo (n= 202)                                                                                                         |                | Placebo:<br>Baseline 229 mg/dL<br>3 yrs no data<br>change +2%                           | Placebo:<br>Baseline 162 mg/dL<br>3 yrs no data<br>change +1%                           | Placebo:<br>Baseline 41 mg/dL<br>3 yrs no data<br>change +2%                          | Placebo:<br>Baseline 165 mg/dL<br>3 yrs no data<br>change +9%                         |                                                                                                    |
|                       | Once daily in evening                                                                                                    |                |                                                                                         |                                                                                         |                                                                                       |                                                                                       |                                                                                                    |
|                       | Mean daily dose 39 mg                                                                                                    |                |                                                                                         |                                                                                         |                                                                                       |                                                                                       |                                                                                                    |

| Author 2              | Treatments & daily dose (mg)                                                                                                                                                                         | Units  | Total cholesterol                                                                                                                                                                            | LDL cholesterol                                                                                                                                                                              | HDL cholesterol                                                                                                                                                                              | Triglycerides                                                                                                                                                                                | Significance testing                                                                                                                                                                                  |
|-----------------------|------------------------------------------------------------------------------------------------------------------------------------------------------------------------------------------------------|--------|----------------------------------------------------------------------------------------------------------------------------------------------------------------------------------------------|----------------------------------------------------------------------------------------------------------------------------------------------------------------------------------------------|----------------------------------------------------------------------------------------------------------------------------------------------------------------------------------------------|----------------------------------------------------------------------------------------------------------------------------------------------------------------------------------------------|-------------------------------------------------------------------------------------------------------------------------------------------------------------------------------------------------------|
| Reigger et al, 1999   | Fluvastatin 40 mg (n=187)<br>85 pts had dose doubled<br><br>Placebo (n=178)                                                                                                                          | mg/dL  | Fluvastatin:<br>Baseline 289 ± 46; 52 wk no data; % change -17.4%<br><br>Placebo:<br>Baseline 284 ± 39; 52 wk no data; % change -4.9%                                                        | Fluvastatin:<br>Baseline 198 ± 39; 52 wk no data; % change no data<br><br>Placebo:<br>Baseline 193 ± 36; 52 wk no data; % change no data                                                     | Fluvastatin:<br>Baseline 53 ± 16; 52 wk no data; % change no data<br><br>Placebo:<br>Baseline 56 ± 16; 52 wk no data; % change no data                                                       | Fluvastatin:<br>Baseline 189 ± 92; 52 wk no data; % change no data<br><br>Placebo:<br>Baseline 183 ± 81; 52 wk no data; % change no data                                                     | Significantly greater reduction in total, LDL cholesterol than with placebo (p<0.0001).<br><br>No significant difference for triglycerides.                                                           |
| Ritter et al, 1993    | Pravastatin 20 mg (n= 79)<br>Evening<br>Dose doubled at 14 wks if total cholesterol not reduced by 15% or above 5.2 mmol/L (n= 12)<br><br>Placebo (n=75)<br>Dose doubled in 58 patients after 14 wks | mmol/L | Pravastatin:<br>Baseline 6.8 (95% CI 5.4 to 8.8)<br>26 wks 5.4 (95% CI 4.0 to 6.8)<br>change<br><br>Placebo:<br>Baseline 6.7 (95% CI 4.9 to 8.4)<br>26 wks 6.6 (95% CI 5.1 to 8.4)<br>change | Pravastatin:<br>Baseline 4.9 (95% CI 3.0 to 6.9)<br>26 wks 3.3 (95% CI 1.1 to 4.9)<br>change<br><br>Placebo:<br>Baseline 4.7 (95% CI 3.3 to 6.6)<br>26 wks 4.4 (95% CI 3.0 to 8.4)<br>change | Pravastatin:<br>Baseline 1.1 (95% CI 0.6 to 5.3)<br>26 wks 1.3 (95% CI 0.7 to 5.9)<br>change<br><br>Placebo:<br>Baseline 1.0 (95% CI 0.6 to 2.5)<br>26 wks 1.2 (95% CI 0.7 to 2.5)<br>change | Pravastatin:<br>Baseline 1.6 (95% CI 0.6 to 5.3)<br>26 wks 1.4 (95% CI 0.5 to 3.6)<br>change<br><br>Placebo:<br>Baseline 1.8 (95% CI 0.7 to 5.5)<br>26 wks 1.7 (95% CI 0.5 to 5.0)<br>change | Significantly greater change in total cholesterol, LDL & triglycerides with pravastatin compared with placebo (p<0.001)<br><br>No significant difference between groups for HDL                       |
| Rubenfire et al, 1991 | Pravastatin 20 mg (n= 57)<br><br>Placebo (n= 25)<br><br>Dose increased to 40 mg at end of wk 8 in all patients                                                                                       | mmol/L | Pravastatin:<br>Baseline 6.9 ± 0.9<br>16 wks 5.3 (no SD)<br>change -23%<br><br>Placebo:<br>Baseline 6.8 ± 0.8<br>16 wks 6.8 (no SD)<br>change 0%                                             | Pravastatin:<br>Baseline 5.2 ± 0.9<br>16 wks 3.6 (no SD)<br>change -31%<br><br>Placebo:<br>Baseline 5.0 ± 0.9<br>16 wks 5.1 (no SD)<br>change +1%                                            | Pravastatin:<br>Baseline 1.1 ± 0.3<br>16 wks 1.2 (no SD)<br>change +9%<br><br>Placebo:<br>Baseline 1.1 ± 0.4<br>16 wks 1.2 (no SD)<br>change +7%                                             | Pravastatin:<br>Baseline 1.6 ± 0.5<br>16 wks 1.3 (no SD)<br>change -20%<br><br>Placebo:<br>Baseline 1.7 ± 0.6<br>16 wks 1.4 (no SD)<br>change -18%                                           | Significant change from baseline with pravastatin for total cholesterol, LDL & HDL (p<0.01) and triglyceride (p<0.05)<br><br>Significantly greater increase in HDL with pravastatin than with placebo |

| Author 2          | Treatments & daily dose (mg)                                                                                                                                                               | Units | Total cholesterol                                                                                                                                                                                                                                                                                                                                                                                                                                                                    | LDL cholesterol                                                                                                                                                                                                                                                                                                                                                                                                   | HDL cholesterol                                                                                                                                                                                                                                                                                                                                                                                                                                      | Triglycerides                                                                                                                                                                                                                                                                                                                                                                                                                                                       | Significance testing                                                                                                                                                                                                                                                                                                                                                                                                                                                                           |
|-------------------|--------------------------------------------------------------------------------------------------------------------------------------------------------------------------------------------|-------|--------------------------------------------------------------------------------------------------------------------------------------------------------------------------------------------------------------------------------------------------------------------------------------------------------------------------------------------------------------------------------------------------------------------------------------------------------------------------------------|-------------------------------------------------------------------------------------------------------------------------------------------------------------------------------------------------------------------------------------------------------------------------------------------------------------------------------------------------------------------------------------------------------------------|------------------------------------------------------------------------------------------------------------------------------------------------------------------------------------------------------------------------------------------------------------------------------------------------------------------------------------------------------------------------------------------------------------------------------------------------------|---------------------------------------------------------------------------------------------------------------------------------------------------------------------------------------------------------------------------------------------------------------------------------------------------------------------------------------------------------------------------------------------------------------------------------------------------------------------|------------------------------------------------------------------------------------------------------------------------------------------------------------------------------------------------------------------------------------------------------------------------------------------------------------------------------------------------------------------------------------------------------------------------------------------------------------------------------------------------|
| Sacks et al, 1996 | Pravastatin 40 mg (n= 2081)<br><br>Placebo (n= 2078)<br><br>Once daily, evening                                                                                                            | mg/dL | Pravastatin:<br>Baseline 209 ± 17<br>5 yrs no data<br>change no data<br><br>Placebo:<br>Baseline 209 ± 17<br>5 yrs no data<br>change no data                                                                                                                                                                                                                                                                                                                                         | Pravastatin:<br>Baseline 139 ± 15 (3.6 mmol/L)<br>5 yrs 98 (2.5 mmol/L)<br>change -32%<br><br>Placebo:<br>Baseline 139 ± 15<br>5 yrs no data<br>change -4%                                                                                                                                                                                                                                                        | Pravastatin:<br>Baseline 39 ± 9<br>5 yrs no data<br>change no data<br><br>Placebo:<br>Baseline 39 ± 9<br>5 yrs no data<br>change no data                                                                                                                                                                                                                                                                                                             | Pravastatin:<br>Baseline 155 ± 61<br>5 yrs no data<br>change no data<br><br>Placebo:<br>Baseline 155 ± 61<br>5 yrs no data<br>change no data                                                                                                                                                                                                                                                                                                                        | Pravastatin was significantly more effective than placebo at changing total cholesterol, LDL, HDL and triglycerides (p<0.001)                                                                                                                                                                                                                                                                                                                                                                  |
| Saito et al, 1991 | Simvastatin 2.5 mg in morning (n=30)<br><br>Simvastatin 2.5 mg in evening (n=28)<br><br>Simvastatin 5 mg in morning (n=32)<br><br>Simvastatin 5 mg in evening (n=29)<br><br>Placebo (n=31) | md/dL | Simvastatin 2.5 mg (am):<br>Baseline 273 ± 340;<br>during treatment 242 ± 37; % change -10.9<br><br>Simvastatin 2.5 mg (pm):<br>Baseline 275 ± 37;<br>during treatment 233 ± 45; % change -15.4<br><br>Simvastatin 5 mg mg (am):<br>Baseline 277 ± 50;<br>during treatment 238 ± 45; % change -13.7<br><br>Simvastatin 5 mg (pm):<br>Baseline 289 ± 47;<br>during treatment 228 ± 39; % change -3.8<br><br>Placebo:<br>Baseline 285 ± 45;<br>during treatment 286 ± 41; % change 0.3 | Simvastatin 2.5 mg (am):<br>Baseline 183 ± 47; 12 wks 149 ± 35; % change -15.1<br><br>Simvastatin 2.5 mg (pm):<br>Baseline 196 ± 37; 12 wks 156 ± 43; % change -21.1<br><br>Simvastatin 5 mg mg (am):<br>Baseline 194 ± 48; 12 wks 153 ± 47; % change -22.0<br><br>Simvastatin 5 mg (pm):<br>Baseline 204 ± 52; 12 wks 141 ± 32; % change -30<br><br>Placebo:<br>Baseline 200 ± 54; 12 wks 200 ± 56; % change 0.5 | Simvastatin 2.5 mg (am):<br>Baseline 54 ± 25; during treatment 58 ± 22; % change 10.6<br><br>Simvastatin 2.5 mg (pm):<br>Baseline 47 ± 15; during treatment 49 ± 15; % change 4.6<br><br>Simvastatin 5 mg mg (am):<br>Baseline 53 ± 18; during treatment 54 ± 18; % change 2.8<br><br>Simvastatin 5 mg (pm):<br>Baseline 53 ± 13; during treatment 56 ± 14; % change 5.4<br><br>Placebo:<br>Baseline 50 ± 14; during treatment 51 ± 16; % change 2.9 | Simvastatin 2.5 mg (am):<br>Baseline 180 ± 105; during treatment 153 ± 76; % change -7.5<br><br>Simvastatin 2.5 mg (pm):<br>Baseline 160 ± 72; during treatment 155 ± 78; % change -1.2<br><br>Simvastatin 5 mg mg (am):<br>Baseline 152 ± 77; during treatment 146 ± 76; % change 1.7<br><br>Simvastatin 5 mg (pm):<br>Baseline 156 ± 69; during treatment 134 ± 53; % change -4.9<br><br>Placebo:<br>Baseline 178 ± 125; during treatment 177 ± 124; % change 5.3 | Significantly greater reduction in total cholesterol & LDL with evening dose of 2.5 or 5 mg simvastatin than with morning dose (p<0.05). 5 mg was significantly better at reducing total cholesterol than 2.5 mg (p<0.05).<br><br>No significant difference from baseline for any group for triglycerides.<br><br>Significant difference from baseline in HDL with all doses of simvastatin except 5 mg given in the morning (p<0.05) No significant difference between simvastatin & placebo. |

| Author 2             | Treatments & daily dose (mg)       | Units  | Total cholesterol                                                                           | LDL cholesterol                                                                             | HDL cholesterol                                                                               | Triglycerides                                                                               | Significance testing                                                                                                                                                                                         |
|----------------------|------------------------------------|--------|---------------------------------------------------------------------------------------------|---------------------------------------------------------------------------------------------|-----------------------------------------------------------------------------------------------|---------------------------------------------------------------------------------------------|--------------------------------------------------------------------------------------------------------------------------------------------------------------------------------------------------------------|
| Salonen et al, 1995  | Pravastatin 40 mg                  | mmol/L | Pravastatin 40 mg:<br>Baseline 6.7 ± 0.6<br>3 yrs 5.2 ± 0.6<br>% change -21.0               | Pravastatin 40 mg:<br>Baseline 4.8 ± 0.6<br>3 yrs 3.4 ± 0.7<br>% change -27.4               |                                                                                               | Pravastatin 40 mg:<br>Baseline 1.7 ± 0.8<br>3 yrs 1.5 ± 0.7<br>% change -7.6                |                                                                                                                                                                                                              |
|                      | Placebo                            |        | Placebo:<br>Baseline 6.7 ± 0.6<br>3 yrs 6.7 ± 0.7<br>% change -0.9                          | Placebo:<br>Baseline 4.8 ± 0.6<br>3 yrs 5.0 ± 0.7<br>% change 1.5                           |                                                                                               | Placebo:<br>Baseline 1.7 ± 0.8<br>3 yrs 1.7 ± 0.8<br>% change 4.7                           |                                                                                                                                                                                                              |
| Santinga et al, 1994 | Pravastatin (n= 94)                | mg/dL  | Pravastatin:<br>Baseline 272 ± 28<br>16 wks 214 ± 31<br>change -22 (95% CI -24 to -20)      | Pravastatin:<br>Baseline 198 ± 24<br>16 wks 139 ± 24<br>change -31% (95% CI -33 to -29)     | Pravastatin:<br>Baseline 50.2 ± 13<br>16 wks 55.4 ± 14<br>change -22% (95% CI -24 to -20)     | Pravastatin:<br>Baseline 144 ± 42<br>16 wks 122 ± 39<br>change -17% (95% CI -21 to -12)     | Significant change from baseline for LDL, HDL, total cholesterol & triglycerides (p<0.001).<br><br>Pravastatin significantly more effective than placebo for LDL, total cholesterol (p<0.001), HDL (p<0.01). |
|                      | Placebo (n= 48)                    |        | Placebo:<br>Baseline 279 ± 43<br>16 wks 282 ± 49<br>change +0.9 (95% CI -2.3 to 4.3)        | Placebo:<br>Baseline 208 ± 41<br>16 wks 210 ± 49<br>change +0.6 (95% CI -3.7 to 5.2)        | Placebo:<br>Baseline 46 ± 11<br>16 wks 55 ± 14<br>change +11% (95% CI 8.5 to 14)              | Placebo:<br>Baseline 155 ± 46<br>16 wks 152 ± 70<br>change -4% (95% CI -11 to -3.2)         |                                                                                                                                                                                                              |
| Seed et al, 1999     | Simvastatin 20 mg evening (n= 194) | mg/dL  | No dispersion (SD/SE provided)<br>Simvastatin:<br>Baseline 7.5<br>12 wks 5.5<br>change -26% | No dispersion (SD/SE provided)<br>Simvastatin:<br>Baseline 5.4<br>12 wks 3.5<br>change -34% | No dispersion (SD/SE provided)<br>Simvastatin:<br>Baseline 1.15<br>12 wks 1.2s<br>change +12% | No dispersion (SD/SE provided)<br>Simvastatin:<br>Baseline 2.0<br>12 wks 1.5<br>change -22% | Significant change from baseline for all lipid parameters with both treatments (p<0.001)<br><br>Simvastatin significantly more effective than pravastatin for changing total & LDL cholesterol (p<0.001)     |
|                      | Pravastatin 40 mg evening (n= 193) |        | Pravastatin:<br>Baseline 7.4<br>12 wks 6.0<br>change -19%                                   | Pravastatin:<br>Baseline 5.3<br>12 wks 3.9<br>change -26%                                   | Pravastatin:<br>Baseline 1.14<br>12 wks 1.22<br>change +12%                                   | Pravastatin:<br>Baseline 2.0<br>12 wks 1.6<br>change -16%                                   |                                                                                                                                                                                                              |

| Author 2                                  | Treatments & daily dose (mg)                                                                                                                                                                                                                                                                   | Units  | Total cholesterol                                      | LDL cholesterol                                        | HDL cholesterol                                        | Triglycerides                                          | Significance testing                                                                                     |
|-------------------------------------------|------------------------------------------------------------------------------------------------------------------------------------------------------------------------------------------------------------------------------------------------------------------------------------------------|--------|--------------------------------------------------------|--------------------------------------------------------|--------------------------------------------------------|--------------------------------------------------------|----------------------------------------------------------------------------------------------------------|
| Sigurdsson et al, 1996                    | Simvastatin (n= 56)                                                                                                                                                                                                                                                                            | mmol/L | Simvastatin:<br>Baseline 6.7 ±0.8<br>16 wks no data    | Simvastatin:<br>Baseline 4.8 ± 0.8<br>16 wks no data   | Simvastatin:<br>Baseline 1.2 ± 0.3<br>16 wks no data   | Simvastatin:<br>Baseline 1.3 ± no SD<br>16 wks no data |                                                                                                          |
|                                           | Fluvastatin (n= 57)                                                                                                                                                                                                                                                                            |        | change -31% ± 10                                       | change -40% ± 15                                       | change 11% ± 17                                        | change -23% ± no SD                                    |                                                                                                          |
|                                           | Dose doubled at wk 10 if 6 wk reading of total cholesterol>5.2 mmol/L                                                                                                                                                                                                                          |        | Fluvastatin:<br>Baseline 6.7 ± 0.7<br>16 wks no data   | Fluvastatin:<br>Baseline 4.9 ± 0.7<br>16 wks no data   | Fluvastatin:<br>Baseline 1.1 ± 0.3<br>16 wks no data   | Fluvastatin:<br>Baseline 1.4 ± no SD<br>16 wks no data |                                                                                                          |
|                                           |                                                                                                                                                                                                                                                                                                |        | change -20% ± 9.3                                      | change -25% ± 11                                       | change 8.8 ± 18                                        | change -23% ± no SD                                    |                                                                                                          |
| Simvastatin Pravastatin Study Group, 1993 | Simvastatin 10-40 mg (n= 275)                                                                                                                                                                                                                                                                  | mg/dL  | Simvastatin:<br>Baseline 301 ± 63<br>18 wks no data    | Simvastatin:<br>Baseline 207 ± 67<br>18 wks no data    | Simvastatin:<br>Baseline 49 ± 13<br>18 wks no data     | Simvastatin:<br>Baseline 141 ± 91<br>18 wks no data    | Simvastatin significantly more effective than pravastatin                                                |
|                                           | Pravastatin 10-40 mg (n=275)                                                                                                                                                                                                                                                                   |        | change -23 (-14%)                                      | change -30 (-23%)                                      | change +9 (+20%)                                       | change -16 (-39%)                                      |                                                                                                          |
|                                           | Initial daily dose doubled after 6 wks & again after 12 wks if LDL remained >130 mg/dL<br>Mean daily dose:<br>Sim & Prav 27 mg/day.<br>Number taking:<br>Sim 10 mg 82 (30%)<br>Sim 20 mg 60 (22%)<br>Sim 40 mg 133 (48%)<br>Prav 10 mg 39 (14%)<br>Prav 20 mg 56 (20%)<br>Prav 40 mg 180 (66%) |        | Pravastatin:<br>Baseline 307 ± 70<br>18 wks no data    | Pravastatin:<br>Baseline 212 ± 73<br>18 wks no data    | Pravastatin:<br>Baseline 52 ± 14<br>18 wks no data     | Pravastatin:<br>Baseline 139 ± 100<br>18 wks no data   |                                                                                                          |
|                                           |                                                                                                                                                                                                                                                                                                |        | change -15 (-14%)                                      | change -19 (-20%)                                      | change +5 (+22%)                                       | change -10 (-35%)                                      |                                                                                                          |
| Steinhagen-Thiessen, 1994                 | Simvastatin 5-10 mg (n= 143 )                                                                                                                                                                                                                                                                  | mmol/L | Simvastatin:<br>Baseline 6.6 no SD<br>12 wks 5.4 no SD | Simvastatin:<br>Baseline 4.6 no SD<br>12 wks 3.3 no SD | Simvastatin:<br>Baseline 1.3 no SD<br>12 wks 1.4 no SD | Simvastatin:<br>Baseline 1.6 no SD<br>12 wks 1.3 no SD | All parameteres significantly changed from baseline except triglycerides with pravastatin.               |
|                                           | Initial 5 mg dose increased to 10 mg after 6 wks                                                                                                                                                                                                                                               |        | change -19% ± 12                                       | change -27% ± 18                                       | change +8% ± 26                                        | change -10% no SD                                      |                                                                                                          |
|                                           | Pravastatin 10 mg (n= 138)<br>Dose remained constant throughout                                                                                                                                                                                                                                |        | Pravastatin:<br>Baseline 6.6 no SD<br>12 wks 5.9 no SD | Pravastatin:<br>Baseline 4.5 no SD<br>12 wks 3.7 no SD | Pravastatin:<br>Baseline 1.3 no SD<br>12 wks 1.4 no SD | Pravastatin:<br>Baseline 1.5 no SD<br>12 wks 1.4 no SD | Pravastatin significantly more effective than placebo for changing total, LDL & HDL cholesterol (p<0.01) |
|                                           |                                                                                                                                                                                                                                                                                                |        | change -11% ± 12                                       | change -17% ± 18                                       | change +8% ± 23                                        | change -4% no SD                                       |                                                                                                          |



| Author 2              | Treatments & daily dose (mg)                                                                                                       | Units  | Total cholesterol                                                               | LDL cholesterol                                                                 | HDL cholesterol                                                                 | Triglycerides                                                                  | Significance testing                                                                                                               |
|-----------------------|------------------------------------------------------------------------------------------------------------------------------------|--------|---------------------------------------------------------------------------------|---------------------------------------------------------------------------------|---------------------------------------------------------------------------------|--------------------------------------------------------------------------------|------------------------------------------------------------------------------------------------------------------------------------|
| Steinmetz et al, 1996 | Simvastatin 20 mg (n=66)                                                                                                           | mg/dL  | Simvastatin:<br>Baseline 292 ± 61<br>12 wks no data<br>change -24.7%            | Simvastatin:<br>Baseline 207 ± 53<br>12 wks no data<br>change -34.95%           | Simvastatin:<br>Baseline 36 ± 12<br>12 wks no data<br>change +15.0%             | Simvastatin:<br>Baseline 257 ± 203<br>12 wks no data<br>change -16.5%          | Simvastatin was significantly better than fenofibrate at reducing total cholesterol.                                               |
|                       | Micronised fenofibrate 200 mg (n= 67)<br><br>Once daily                                                                            |        | Fenofibrate:<br>Baseline 294 ± 56<br>12 wks no data<br>change -19.5%            | Fenofibrate:<br>Baseline 213 ± 53<br>12 wks no data<br>change -20.85%           | Fenofibrate:<br>Baseline 37 ± 13<br>12 wks no data<br>change +18.5%             | Fenofibrate:<br>Baseline 215 ± 142<br>12 wks no data<br>change -41.4%          |                                                                                                                                    |
| Sweany et al, 1993    | Simvastatin 10 mg (n=275)                                                                                                          | mg/dL  | Simvastatin:<br>Baseline 301 ± 63<br>18 wks no data<br>change -27% ± 11         | Simvastatin:<br>Baseline 207 ± 67<br>18 wks no data<br>change -38% ± 17         | Simvastatin:<br>Baseline 49 ± 13<br>18 wks no data<br>change +15% ± 21          | Simvastatin:<br>Baseline 141 ± 91<br>18 wks no data<br>change -18% ± 32        | Simvastatin significantly better at reducing total cholesterol & LDL than pravastatin (p<0.01).                                    |
|                       | Pravastatin 10 mg (n=275)<br><br>Evening<br>Dose titration from 10 mg to 40 mg/day at 6 & 12 wks if LDL >130 mg/dL (3.4 mmol/L)    |        | Pravastatin:<br>Baseline 307 ± 70<br>18 wks no data<br>change -19% ± 14         | Pravastatin:<br>Baseline 212 ± 73<br>18 wks no data<br>change -26% ± 20         | Pravastatin:<br>Baseline 52 ± 14<br>18 wks no data<br>change +12% ± 22          | Pravastatin:<br>Baseline 139 ± 100<br>18 wks no data<br>change -14% ± 33       |                                                                                                                                    |
| Teo et al, 1997       | Simvastatin 10-40 mg (n= 230)                                                                                                      | mmol/L | Simvastatin:<br>Baseline: 5.2 ± 0.6<br>3 yrs 4.1 ± 0.6<br>change -1.09 (-20.6%) | Simvastatin:<br>Baseline: 3.4 ± 0.6<br>3 yrs 2.3 ± 0.5<br>change -1.06 (-30.5%) | Simvastatin:<br>Baseline: 0.99 ± 0.2<br>3 yrs 1.1 ± 0.2<br>change +0.07 (+8.4%) | Simvastatin:<br>Baseline: 1.9 ± 0.8<br>3 yrs 1.6 ± 0.7<br>change -0.23 (-9.7%) | Simvastatin significantly more effective than placebo at changing total cholesterol, LDL, triglycerides (p<0.001) and HDL (p<0.05) |
|                       | Placebo (n= 230)<br><br>Once daily evening<br><br>Dose titration according to LDL levels<br><br>Average daily dose: 28.5 mg ± 13.0 |        | Placebo:<br>Baseline: 5.1 ± 0.6<br>3 yrs 5.3 ± 0.7<br>change +0.15 (+3.3%)      | Placebo:<br>Baseline: 3.3 ± 0.6<br>3 yrs 3.4 ± 0.5<br>change +0.08 (+3.5%)      | Placebo:<br>Baseline: 0.97 ± 0.3<br>3 yrs 1.0 ± 0.3<br>change +0.02 (+3.4%)     | Placebo:<br>Baseline: 1.8 ± 0.7<br>3 yrs 1.9 ± 0.9<br>change 0.13 (-8.6%)      |                                                                                                                                    |

| Author 2                                                     | Treatments & daily dose (mg)                                           | Units                                                             | Total cholesterol                                                 | LDL cholesterol                                                   | HDL cholesterol                                                   | Triglycerides                                             | Significance testing                                                                                     |
|--------------------------------------------------------------|------------------------------------------------------------------------|-------------------------------------------------------------------|-------------------------------------------------------------------|-------------------------------------------------------------------|-------------------------------------------------------------------|-----------------------------------------------------------|----------------------------------------------------------------------------------------------------------|
| The Lovastatin Pravastatin Study Group, 1993                 | Lovastatin (n= 339)                                                    | mg/dL                                                             | Lovastatin:<br>Baseline 287 ± 45<br>18 wks no data                | Lovastatin:<br>Baseline 194 ± 48<br>18 wks no data                | Lovastatin:<br>Baseline 51 ± 16<br>18 wks no data                 | Lovastatin:<br>Baseline 145 ± 80<br>18 wks no data        | Significant change from baseline to 18 wks with lovastatin for total cholesterol & LDL (p<0.05).         |
|                                                              | Pravastatin (n= 333)                                                   |                                                                   | change -28% ± 13                                                  | change -39% ± 18                                                  | change +19% ± 41                                                  | change -22% ± 35                                          |                                                                                                          |
|                                                              | Dose titration from 20 mg to 80 mg/day (at 6 & 12 wks) in all patients |                                                                   | Pravastatin:<br>Baseline 288 ± 47<br>18 wks no data               | Pravastatin:<br>Baseline 196 ± 49<br>18 wks no data               | Pravastatin:<br>Baseline 49 ± 16<br>18 wks no data                | Pravastatin:<br>Baseline 140 ± 206<br>18 wks no data      | Reduction in triglycerides significantly better with lovastatin than with pravastatin at 18 wks (p<0.05) |
| The Lovastatin Study Group, 1990                             | Lovastatin 40 mg morning (n= 49)                                       | mmol/L                                                            | Lovastatin 40 mg morning:<br>Baseline 9.5 no SD<br>14 wks no data | Lovastatin 40 mg morning:<br>Baseline 7.5 no SD<br>14 wks no data | Lovastatin 40 mg morning:<br>Baseline 1.1 no SD<br>14 wks no data | Lovastatin 40 mg morning:<br>Baseline 1.6 no SD<br>14 wks |                                                                                                          |
|                                                              | Lovastatin 40 mg evening (n= 47)                                       |                                                                   | change -20%                                                       | change -25%                                                       | change +11%                                                       | change                                                    |                                                                                                          |
|                                                              | Lovastatin 40 mg twice daily (n= 48)                                   |                                                                   | Lovastatin: 40 mg evening<br>Baseline 9.6 no SD<br>14 wks no data | Lovastatin: 40 mg evening<br>Baseline 7.7 no SD<br>14 wks no data | Lovastatin: 40 mg evening<br>Baseline 1.3 no SD<br>14 wks no data | Lovastatin: 40 mg evening<br>Baseline 1.3 no SD<br>14 wks |                                                                                                          |
|                                                              | Lovastatin 80 mg evening (n= 49)                                       |                                                                   | change -25%                                                       | change -32%                                                       | change +9%                                                        | change                                                    |                                                                                                          |
|                                                              | Lovastatin 40 mg twice evening (n= 49)                                 |                                                                   | Lovastatin 40 mg twice:<br>Baseline 9.4 no SD<br>14 wks no data   | Lovastatin 40 mg twice:<br>Baseline 7.8 no SD<br>14 wks no data   | Lovastatin 40 mg twice:<br>Baseline 1.1 no SD<br>14 wks no data   | Lovastatin 40 mg twice:<br>Baseline 1.6 no SD<br>14 wks   |                                                                                                          |
|                                                              | change -33%                                                            |                                                                   | change -39%                                                       | change +11%                                                       | change                                                            |                                                           |                                                                                                          |
| Probuco 500 mg given twice daily (n= 97). Daily dose 1000 mg | Lovastatin 80 mg evening:<br>Baseline 9.8 no SD<br>14 wks no data      | Lovastatin 80 mg evening:<br>Baseline 7.6 no SD<br>14 wks no data | Lovastatin 80 mg evening:<br>Baseline 1.2 no SD<br>14 wks no data | Lovastatin 80 mg evening:<br>Baseline 1.5 no SD<br>14 wks         |                                                                   |                                                           |                                                                                                          |
|                                                              | change -30%                                                            | change -36%                                                       | change +10%                                                       | change                                                            |                                                                   |                                                           |                                                                                                          |
|                                                              | Probuco:<br>Baseline 9.5 no SD<br>14 wks no data                       | Probuco:<br>Baseline 7.6 no SD<br>14 wks no data                  | Probuco:<br>Baseline 1.1 no SD<br>14 wks no data                  | Probuco:<br>Baseline 1.8 no SD<br>14 wks                          |                                                                   |                                                           |                                                                                                          |
|                                                              | change -10%                                                            | change -8%                                                        | change -23%                                                       | change                                                            |                                                                   |                                                           |                                                                                                          |

| Author 2                                                                  | Treatments & daily dose (mg)                                                                                                                                                                                                                                                                           | Units  | Total cholesterol                                                                                                                                                                                                                                                                                                                      | LDL cholesterol                                                                                                                                                                                                                                                                                                                              | HDL cholesterol                                                                                                                                                                                                                                                                                                                        | Triglycerides                                                                                                                                                                                                                                                                                                                                | Significance testing                                                                                                                                     |
|---------------------------------------------------------------------------|--------------------------------------------------------------------------------------------------------------------------------------------------------------------------------------------------------------------------------------------------------------------------------------------------------|--------|----------------------------------------------------------------------------------------------------------------------------------------------------------------------------------------------------------------------------------------------------------------------------------------------------------------------------------------|----------------------------------------------------------------------------------------------------------------------------------------------------------------------------------------------------------------------------------------------------------------------------------------------------------------------------------------------|----------------------------------------------------------------------------------------------------------------------------------------------------------------------------------------------------------------------------------------------------------------------------------------------------------------------------------------|----------------------------------------------------------------------------------------------------------------------------------------------------------------------------------------------------------------------------------------------------------------------------------------------------------------------------------------------|----------------------------------------------------------------------------------------------------------------------------------------------------------|
| The Pravastatin Multinational Study Group for Cardiac Risk Patients, 1993 | Pravastatin 20 mg evening (n= 530)<br><br>Placebo (n= 532)<br><br>Dose doubled at 13 wks if total cholesterol not reduced by 15% or above 5.2 mmol/L (n= 69; 31%)                                                                                                                                      | mmol/L | Pravastatin (n=521):<br>Baseline 6.8 ± 0.8<br>26 wks 5.6 ± 0.8<br>change -19%<br><br>Placebo (n= 529):<br>Baseline 6.9 ± 0.8<br>26 wks 6.9 ± 0.9<br>change -0.2%                                                                                                                                                                       | Pravastatin (n=499):<br>Baseline<br>26 wks<br>change<br><br>Placebo (n= 510):<br>Baseline<br>26 wks<br>change                                                                                                                                                                                                                                | Pravastatin (n= 500):<br>Baseline 1.1 ± 0.4<br>26 wks 1.2 ± 0.4<br>change +7.9%<br><br>Placebo (n= 510):<br>Baseline 1.2 ± 0.4<br>26 wks 1.2 ± 0.4<br>change +2.6%                                                                                                                                                                     | Pravastatin (n= 520):<br>Baseline 1.8 ± 0.8<br>26 wks 1.6 ± 0.7<br>change -12%<br><br>Placebo (n=525):<br>Baseline 1.9 ± 0.9<br>26 wks 1.8 ± 0.9<br>change -1.1%                                                                                                                                                                             | Significant change from baseline for total cholesterol, LDL & triglycerides with pravastatin compared with placebo (p<0.001).                            |
| Tikkanen et al, 1988                                                      | Lovastatin (n= 167)<br>Evening Stratum I: (n=53)<br>20-40 mg/day<br>Stratum II: n=114)<br>40-80 mg/day<br>Number titrated to higher dose:<br>Stratum I: 49<br>Stratum II: 106<br><br>Gemfibrozil (n= 167)<br>Stratum I & II:<br>600 mg given twice daily<br>Stratum I: (n= 56)<br>Stratum II: (n= 111) | mg/dL  | Lovastatin Stratum I:<br>Baseline 287 no SD<br>12 wks no data<br>change -23%<br><br>Lovastatin Stratum II:<br>Baseline 378 no SD<br>12 wks no data<br>change -34%<br><br>Gemfibrozil Stratum I:<br>Baseline 282 no SD<br>12 wks no data<br>change -11%<br><br>Gemfibrozil Stratum II:<br>Baseline 365<br>12 wks no data<br>change -16% | Lovastatin Stratum I:<br>Baseline 202 no SD<br>12 wks no data<br>change -31%<br><br>Lovastatin Stratum II:<br>Baseline 293 no SD<br>12 wks no data<br>change -42%<br><br>Gemfibrozil Stratum I:<br>Baseline 201 no SD<br>12 wks no data<br>change -13%<br><br>Gemfibrozil Stratum II:<br>Baseline 281 no SD<br>12 wks no data<br>change -18% | Lovastatin Stratum I:<br>Baseline 48 no SD<br>12 wks no data<br>change +7%<br><br>Lovastatin Stratum II:<br>Baseline 47 no SD<br>12 wks no data<br>change +8%<br><br>Gemfibrozil Stratum I:<br>Baseline 49 no SD<br>12 wks no data<br>change +18%<br><br>Gemfibrozil Stratum II:<br>Baseline 52 no SD<br>12 wks no data<br>change +12% | Lovastatin Stratum I:<br>Baseline 185 no SD<br>12 wks no data<br>change -13%<br><br>Lovastatin Stratum II:<br>Baseline 181 no SD<br>12 wks no data<br>change -14%<br><br>Gemfibrozil Stratum I:<br>Baseline 170 no SD<br>12 wks no data<br>change -45%<br><br>Gemfibrozil Stratum II:<br>Baseline 167 no SD<br>12 wks no data<br>change -39% | Lovastatin significantly more effective than gemfibrozil for total cholesterol & LDL but significantly less effective for HDL and triglycerides (p<0.01) |

| Author 2                                               | Treatments & daily dose (mg)                                                                                                                         | Units             | Total cholesterol                            | LDL cholesterol                              | HDL cholesterol                             | Triglycerides                                | Significance testing                                                                                                                                                                                                                  |
|--------------------------------------------------------|------------------------------------------------------------------------------------------------------------------------------------------------------|-------------------|----------------------------------------------|----------------------------------------------|---------------------------------------------|----------------------------------------------|---------------------------------------------------------------------------------------------------------------------------------------------------------------------------------------------------------------------------------------|
| Tikkanen et al, 1989                                   | Simvastatin given once daily in the afternoon                                                                                                        | mg/dL             | Simvastatin stratum I: Baseline 296 ± no SD  | Simvastatin stratum I: Baseline 217 ± no SD  | Simvastatin stratum I: Baseline 46 ± no SD  | Simvastatin stratum I: Baseline 165 ± no SD  | Stratum I (LDL<195 mg/dL):<br>Simvastatin significantly better than gemfibrozil at reducing total & LDL cholesterol (p<0.01).<br>Gemfibrozil significantly better than simvastatin at changing HDL (p<0.05) & triglycerides (p<0.01). |
|                                                        | Simvastatin 5 mg (stratum I) (n= 68)                                                                                                                 |                   | 12 wks -21± no SD                            | 12 wks -26 ± no SD                           | 12 wks +7.0 ± no SD                         | 12 wks -10 ± no SD                           |                                                                                                                                                                                                                                       |
|                                                        | Simvastatin 10 mg (stratum II) (n= 78)                                                                                                               |                   | change -19% ± no SD                          | change                                       | change                                      | change                                       |                                                                                                                                                                                                                                       |
|                                                        | Dose was doubled after 6 wks if LDL >140 mg/dL                                                                                                       |                   | Simvastatin stratum II: Baseline 347 ± no SD | Simvastatin stratum II: Baseline 265 ± no SD | Simvastatin stratum II: Baseline 49 ± no SD | Simvastatin stratum II: Baseline 151 ± no SD |                                                                                                                                                                                                                                       |
| Gemfibrozil 600 mg twice daily (n= 68)                 | Stratum I: Gemfibrozil 600 mg twice daily (n=75)<br>Stratum II: Daily dose 1200 mg<br>Dose was unchanged throughout                                  | mg/dL             | Gemfibrozil stratum I: Baseline 318 ± no SD  | Gemfibrozil stratum I: Baseline 240 ± no SD  | Gemfibrozil stratum I: Baseline 46 ± no SD  | Gemfibrozil stratum I: Baseline 165 ± no SD  | Stratum II (LDL>195 mg/dL):<br>Simvastatin significantly better than gemfibrozil at reducing total & LDL cholesterol (p<0.01).<br>Gemfibrozil significantly better than simvastatin at changing HDL & triglycerides (p<0.05).         |
|                                                        |                                                                                                                                                      |                   | 12 wks -15 ± no SD                           | 12 wks -18 ± no SD                           | 12 wks 17 ± no SD                           | 12 wks -31 ± no SD                           |                                                                                                                                                                                                                                       |
|                                                        |                                                                                                                                                      |                   | change -14% ± no SD                          | change                                       | change                                      | change                                       |                                                                                                                                                                                                                                       |
|                                                        |                                                                                                                                                      |                   | Gemfibrozil stratum II: Baseline 350 ± no SD | Gemfibrozil stratum II: Baseline 272 ± no SD | Gemfibrozil stratum II: Baseline 46 ± no SD | Gemfibrozil stratum II: Baseline 159 ± no SD |                                                                                                                                                                                                                                       |
| 12 wks -15 ± no SD                                     | 12 wks -17 ± no SD                                                                                                                                   | 12 wks 16 ± no SD | 12 wks -32 ± no SD                           | change no data                               | change no data                              |                                              |                                                                                                                                                                                                                                       |
| change no data                                         | change no data                                                                                                                                       | change no data    | change no data                               |                                              |                                             |                                              |                                                                                                                                                                                                                                       |
| Valles et al, 1991                                     | Lovastatin<br>Group I 20 mg (n=44)<br>Group II 40 mg (n=42)<br><br>Given in evening<br>Dose was doubled after 6 wks if total cholesterol > 200 mg/dL | mg/dL             | Lovastatin Group I: Baseline 274 ± 16        | Lovastatin Group I: Baseline 202 ± 18        | Lovastatin Group I: Baseline 46 ± 13        | Lovastatin Group I: Baseline 132 ± 58        | Lovastatin significantly more effective than gemfibrozil at reducing total cholesterol, LDL (p<0.001) and HDL (p<0.05) in groups I & II, and triglycerides in groups I (p<0.01) & II (p<0.001) .                                      |
|                                                        |                                                                                                                                                      |                   | 12 wks 218 ± 27                              | 12 wks 145 ± 23                              | 12 wks 50 ± 13                              | 12 wks 110 ± 49                              |                                                                                                                                                                                                                                       |
|                                                        |                                                                                                                                                      |                   | change -20%                                  | change -28%                                  | change +8%                                  | change -17%                                  |                                                                                                                                                                                                                                       |
|                                                        |                                                                                                                                                      |                   | Lovastatin Group II: Baseline 364 ± 67       | Lovastatin Group II: Baseline 284 ± 75       | Lovastatin Group II: Baseline 51 = 15       | Lovastatin Group II: Baseline 147 ± 76       |                                                                                                                                                                                                                                       |
| 12 wks 268 ± 56                                        | 12 wks 189 ± 60                                                                                                                                      | 12 wks 54 ± 13    | 12 wks 120 ± 73                              | change -26%                                  | change -33%                                 | change +6%                                   | change -19%                                                                                                                                                                                                                           |
| change -26%                                            | change -33%                                                                                                                                          | change +6%        | change -19%                                  |                                              |                                             |                                              |                                                                                                                                                                                                                                       |
| Gemfibrozil 1200 mg (600 mg given twice daily) (n= 96) | Group I (n=43)<br>Group II (n=53)                                                                                                                    | mg/dL             | Gemfibrozil Group I: Baseline 270 ± 12       | Gemfibrozil Group I: Baseline 196 ± 16       | Gemfibrozil Group I: Baseline 48 ± 12       | Gemfibrozil Group I: Baseline 130 ± 48       |                                                                                                                                                                                                                                       |
|                                                        |                                                                                                                                                      |                   | 12 wks 250 ± 34                              | 12 wks 177 ± 31                              | 12 wks 55 ± 15                              | 12 wks 92 ± 47                               |                                                                                                                                                                                                                                       |
|                                                        |                                                                                                                                                      |                   | change -8%                                   | change -9%                                   | change +14%                                 | change -28%                                  |                                                                                                                                                                                                                                       |
|                                                        |                                                                                                                                                      |                   | Gemfibrozil Group II: Baseline 345 ± 53      | Gemfibrozil Group II: Baseline 266 ± 59      | Gemfibrozil Group II: Baseline 46 ± 12      | Gemfibrozil Group II: Baseline 169 ± 71      |                                                                                                                                                                                                                                       |
| 12 wks 299 ± 59                                        | 12 wks 227 ± 65                                                                                                                                      | 12 wks 50 ± 14    | 12 wks 113 ± 70                              | change -13%                                  | change -14%                                 | change +9%                                   | change -33%                                                                                                                                                                                                                           |
| change -13%                                            | change -14%                                                                                                                                          | change +9%        | change -33%                                  |                                              |                                             |                                              |                                                                                                                                                                                                                                       |

| Author 2            | Treatments & daily dose (mg)                                                                                                                                                                                   | Units  | Total cholesterol                                                           | LDL cholesterol                                                             | HDL cholesterol                                                               | Triglycerides                                                                | Significance testing                                                                                                |
|---------------------|----------------------------------------------------------------------------------------------------------------------------------------------------------------------------------------------------------------|--------|-----------------------------------------------------------------------------|-----------------------------------------------------------------------------|-------------------------------------------------------------------------------|------------------------------------------------------------------------------|---------------------------------------------------------------------------------------------------------------------|
| Van Dam et al, 2001 | Simvastatin 10 mg/day (n= 237)                                                                                                                                                                                 | mmol/L | Simvastatin:<br>Baseline 6.8 ± 0.7<br>18 wks no data<br>change -27%         | Simvastatin:<br>Baseline 4.7 ± 0.6<br>18 wks no data<br>change -36%         | Simvastatin:<br>Baseline 1.1 ± 0.3<br>18 wks no data<br>change +10%           | Simvastatin:<br>Baseline 1.9 ± 0.9<br>18 wks no data<br>change -18%          | Simvastatin significantly better at changing total cholesterol, triglycerides, HDL & LDL than fluvastatin (p<0.001) |
|                     | Fluvastatin 20 mg/day (n= 241)                                                                                                                                                                                 |        | Fluvastatin:<br>Baseline 6.8 ± 0.8<br>18 wks no data<br>change -20%         | Fluvastatin:<br>Baseline 4.7 ± 0.6<br>18 wks no data<br>change -28%         | Fluvastatin:<br>Baseline 1.2 ± 0.3<br>18 wks no data<br>change +7%            | Fluvastatin:<br>Baseline 2.0 ± 0.9<br>18 wks no data<br>change -11%          |                                                                                                                     |
|                     | Initial dose doubled after 6 & 12 wks if LDL > than goal                                                                                                                                                       |        |                                                                             |                                                                             |                                                                               |                                                                              |                                                                                                                     |
|                     | Pts whose dose was titrated up: Sim 64% vs Fluv 87%                                                                                                                                                            |        |                                                                             |                                                                             |                                                                               |                                                                              |                                                                                                                     |
| Waters et al, 1994  | Lovastatin 20 mg Evening (n= 165)                                                                                                                                                                              | mg/dL  | Lovastatin:<br>Baseline 250 no SD<br>24 mths no data<br>change -21% ± 11    | Lovastatin:<br>Baseline 173 no SD<br>24 mths no data<br>change -29% ± 11    | Lovastatin:<br>Baseline 41.3 no SD<br>24 mths 43.2 no SD<br>change +7.3% ± 19 | Lovastatin:<br>Baseline 194 no SD<br>24 mths no data<br>change -8.1% ± 34    | Lovastatin significantly better at reducing total & LDL cholesterol than placebo (p<0.01)                           |
|                     | Placebo Evening (n= 166)                                                                                                                                                                                       |        | Placebo:<br>Baseline 249 no SD<br>24 mths no data<br>change -1.4% ± 9       | Placebo:<br>Baseline 173 no SD<br>24 mths no data<br>change -1.6 ± 12       | Placebo:<br>Baseline 41.3 no SD<br>24 mths 42.0 no SD<br>change +3.0% ± 16    | Placebo:<br>Baseline 196 no SD<br>24 mths no data<br>change +3.8% ± 36       |                                                                                                                     |
|                     | Dose doubled if LDL >130 mg/dL at wk 4 & again to 40 mg twice daily at wk 16. Dose reduced if LDL fell below 80 mg/dL<br>Doses taken:<br>20 mg 91/165<br>40 mg 41/165<br>80 mg 33/165<br>Mean daily dose 36 mg |        |                                                                             |                                                                             |                                                                               |                                                                              |                                                                                                                     |
| Weir et al, 1996    | Lovastatin 40 mg (n= 211) Evening meal                                                                                                                                                                         | mg/dL  | Lovastatin:<br>Baseline 270 ± 33<br>12 wks 215 ± no SD<br>change -20% ± 11  | Lovastatin:<br>Baseline 195 ± 30<br>12 wks 139 ± no SD<br>change -28% ± 13  | Lovastatin:<br>Baseline 42 ± 10<br>12 wks 45 ± no SD<br>change +8.5% ± 16     | Lovastatin:<br>Baseline 174 ±88<br>12 wks 153 ± no SD<br>change -6.0% ± 38   | All changes were significantly different from baseline                                                              |
|                     | Pravastatin 40 mg (n= 215) Bedtime                                                                                                                                                                             |        | Pravastatin:<br>Baseline 280 ± 35<br>12 wks 225 ± no SD<br>change -19% ± 11 | Pravastatin:<br>Baseline 202 ± 30<br>12 wks 150 ± no SD<br>change -26% ± 14 | Pravastatin:<br>Baseline 42 ± 10<br>12 wks 45 ± no SD<br>change +8.2% ± 16    | Pravastatin:<br>Baseline 183 ± 49<br>12 wks 157 ± no SD<br>change -8.6% ± 55 |                                                                                                                     |

| Author 2                                               | Treatments & daily dose (mg)                                               | Units  | Total cholesterol                                                                                                                                                                                                                                     | LDL cholesterol                                                                                                                                                                                                                                      | HDL cholesterol                                                                                                                                                                                                                                               | Triglycerides                                                                                                                                                                                                                                   | Significance testing                                                                                                                                                                                                                                                                                                                                           |
|--------------------------------------------------------|----------------------------------------------------------------------------|--------|-------------------------------------------------------------------------------------------------------------------------------------------------------------------------------------------------------------------------------------------------------|------------------------------------------------------------------------------------------------------------------------------------------------------------------------------------------------------------------------------------------------------|---------------------------------------------------------------------------------------------------------------------------------------------------------------------------------------------------------------------------------------------------------------|-------------------------------------------------------------------------------------------------------------------------------------------------------------------------------------------------------------------------------------------------|----------------------------------------------------------------------------------------------------------------------------------------------------------------------------------------------------------------------------------------------------------------------------------------------------------------------------------------------------------------|
| West of Scotland Coronary Prevention Study Group, 1992 | Pravastatin 40 mg daily (n=3302)<br>Placebo (n=3293)<br>Once daily evening | mg/dL  | Pravastatin:<br>Baseline 272 ±23<br>5 yrs PP analysis 218<br>change -20%<br><br>Placebo:<br>Baseline 272 ±22<br>5 yrs no significant<br>change<br>no significant change                                                                               | Pravastatin:<br>Baseline 192 ±17<br>5 yrs PP analysis 142<br>change -26%<br><br>Placebo:<br>Baseline 192 ±17<br>5 yrs no significant<br>change<br>no significant change                                                                              | Pravastatin:<br>Baseline 44 ±9<br>5 yrs PP analysis no<br>data<br>change +5%<br><br>Placebo:<br>Baseline 44 ±10<br>5 yrs no significant<br>change<br>no significant change                                                                                    | Pravastatin:<br>Baseline 162 ±70<br>5 yrs PP analysis no<br>data<br>change -12%<br><br>Placebo:<br>Baseline 164 ±68<br>5 yrs no significant<br>change<br>no significant change                                                                  | No data                                                                                                                                                                                                                                                                                                                                                        |
| Wiklund et al, 1993                                    | Pravastatin 40 mg once in the evening (n= 71)                              | mmol/L | Pravastatin:<br>Baseline 7.1 ± 0.13<br>12 wks 5.44 ± 0.11<br>change -26% no SD<br><br>Gemfibrozil:<br>Baseline 7.3 ± 0.14<br>12 wks 6.2 ± 0.12<br>change -15% no SD<br><br>Placebo:<br>Baseline 7.2 ± 0.12<br>12 wks 7.1 ± 0.12<br>change -1.7% no SD | Pravastatin:<br>Baseline 5.2 ± 0.14<br>12 wks 3.4 ± 0.11<br>change -33% no SD<br><br>Gemfibrozil:<br>Baseline 5.2 ± 0.13<br>12 wks 4.3 ± 0.11<br>change -17% no SD<br><br>Placebo:<br>Baseline 5.1 ± 0.12<br>12 wks 5.0 ± 0.13<br>change -1.9% no SD | Pravastatin:<br>Baseline 1.25 ± 0.05<br>12 wks 1.32 ± 0.04<br>change 5.93% no SD<br><br>Gemfibrozil:<br>Baseline 1.20 ± 0.05<br>12 wks 1.39 ± 0.04<br>change 15.21% no SD<br><br>Placebo:<br>Baseline 1.20 ± 0.04<br>12 wks 1.16 ± 0.03<br>change -4.4% no SD | Pravastatin:<br>Baseline 1.8 ± 0.1<br>12 wks 1.5 ± 0.1<br>change -14% no SD<br><br>Gemfibrozil:<br>Baseline 1.8 ± 0.1<br>12 wks 1.0 ± 0.05<br>change -42% no SD<br><br>Placebo:<br>Baseline 1.8 ± 0.1<br>12 wks 1.8 ± 0.1<br>change +1.9% no SD | Significant change from baseline for all active treatments for all lipid parameters.<br><br>Pravastatin significantly better at changing total cholesterol & LDL compared with gemfibrozil, placebo & baseline (p<0.01).<br><br>Gemfibrozil, significantly better at changing triglycerides & HDL than compared with pravastatin, placebo & baseline (p<0.01). |
